# Supplementary material for: Assessing donor-to-donor variability in human intestinal organoid cultures
Source: PubMed Central journal article supplement — Stem Cell Reports. 2021 Aug 26;16(9):2364–78. doi: 10.1016/j.stemcr.2021.07.016 (PMC8452536; doi:10.1016/j.stemcr.2021.07.016), 2021-08-26
Supplement: mmc2.pdf [file mmc2.pdf]

## Assessing donor-to-donor variability in human intestinal organoid cultures

Sina Mohammadi,<sup>1,\*</sup> Carolina Morell-Perez,<sup>1,2</sup> Charles W. Wright,<sup>1</sup> Thomas P. Wyche,<sup>1</sup> Cory H. White,<sup>1</sup> Theodore R. Sana,<sup>1</sup> and Linda A. Lieberman<sup>1,\*</sup>

<sup>1</sup>Exploratory Science Center, Merck & Co., Inc., Cambridge, MA 02141, USA

<sup>2</sup>Present address: Health and Environmental Sciences Institute, Washington, DC 20005, USA

\*Correspondence: [sina.mohammadi@merck.com](mailto:sina.mohammadi@merck.com) (S.M.), [linda.lieberman@merck.com](mailto:linda.lieberman@merck.com) (L.A.L.)

<https://doi.org/10.1016/j.stemcr.2021.07.016>

### SUMMARY

Donor-to-donor variability in primary human organoid cultures has not been well characterized. As these cultures contain multiple cell types, there is greater concern that variability could lead to increased noise. In this work we investigated donor-to-donor variability in human gut adult stem cell (ASC) organoids. We examined intestinal developmental pathways during culture differentiation in ileum- and colon-derived cultures established from multiple donors, showing that differentiation patterns were consistent among cultures. This finding indicates that donor-to-donor variability in this system remains at a manageable level. Intestinal metabolic activity was evaluated by targeted analysis of central carbon metabolites and by analyzing hormone production patterns. Both experiments demonstrated similar metabolic functions among donors. Importantly, this activity reflected intestinal biology, indicating that these ASC organoid cultures are appropriate for studying metabolic processes. This work establishes a framework for generating high-confidence data using human primary cultures through thorough characterization of variability.

### INTRODUCTION

Historically, intestinal biology has been studied using immortalized or transformed cell lines. While these cell lines play a useful role, primary cell-culture models provide a more physiologically relevant system to address unanswered questions and more accurately model *in vivo* responses. Groundbreaking work in 2009 described modern organotypic cultures that are derived from adult mouse intestinal stem cells, are self-organizing, and contain nearly a complete repertoire of functional (terminally differentiated) cells as found in the originating tissue (Sato et al., 2009). A system derived from human intestinal stem cell was described subsequently (Sato et al., 2011a). These adult stem cell (ASC) organoid cultures enable a vast swath of *in vitro* studies in cells derived from a healthy host, in contrast to previous culture systems that relied on immortalized or transformed cells.

Gut ASC organoid cultures containing differentiated cells recapitulate *in vivo* intestinal cell composition. Absorptive and secretory cell types, which carry out the function of the intestine, are present in ASC organoid cultures. Enterocytes serve as absorptive cells in the intestine and are the most abundant cell type (Fish and Burns, 2020). Their function is quite diverse, ranging from lipid, sugar, amino acid, and inorganic molecule metabolism to bile acid reabsorption (Chen et al., 2018; Dawson, 2011; Gao et al., 2019; Hernando and Wagner, 2018; Hussain, 2014; Ko et al., 2020). Three secretory cell types commonly found in the intestine are also found in ASC organoids. Paneth cells are specialized secretory cells that reside at the base of intestinal crypts. In addition to secreting antimicrobial peptides

and proteins, Paneth cells produce essential niche signals required for stem cell maintenance (Clevers and Bevins, 2013). Goblet cells produce and secrete mucus (Johansson et al., 2013), thereby generating a barrier surface. Enteroendocrine cells produce and secrete neurotransmitters and incretin hormones (Gribble and Reimann, 2019) that play major roles in gut peristalsis and vasodilation as well as pancreatic insulin secretion and satiety. Two other cell types (tuft cells [Nevo et al., 2019] and microfold cells [Dillon and Lo, 2019]) occur *in vivo*, but differentiation toward these lineages has to be induced by the addition of cytokines in ASC organoid cultures.

As ASC organoids contain both stem and differentiated cells, they have been deployed in a range of studies including fundamental pathway analysis efforts (Date and Sato, 2015; Dubey et al., 2020; Lindemans et al., 2015), establishing disease models (Bartfeld, 2016; Schutgens and Clevers, 2020; van der Vaart and Clevers, 2020), validating drug activity and efficacy, and genetic screening efforts (Michels et al., 2020; Ringel et al., 2020). Despite wide deployment, to date variations among donors in differentiation patterns and, therefore, functional readouts have not been characterized in human ASC intestinal organoid cultures. To address this knowledge gap, we established cultures from ileum and colon of six donors and examined donor-to-donor variability for multiple parameters. We show a high degree of correlation among donors, indicating that differentiation patterns are consistent. Additionally, small differences among donors in fundamental intestinal functions (such as metabolic activity and hormone secretion) did not hinder interpretation of results. Taken together, these data highlight the importance

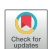

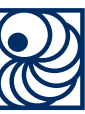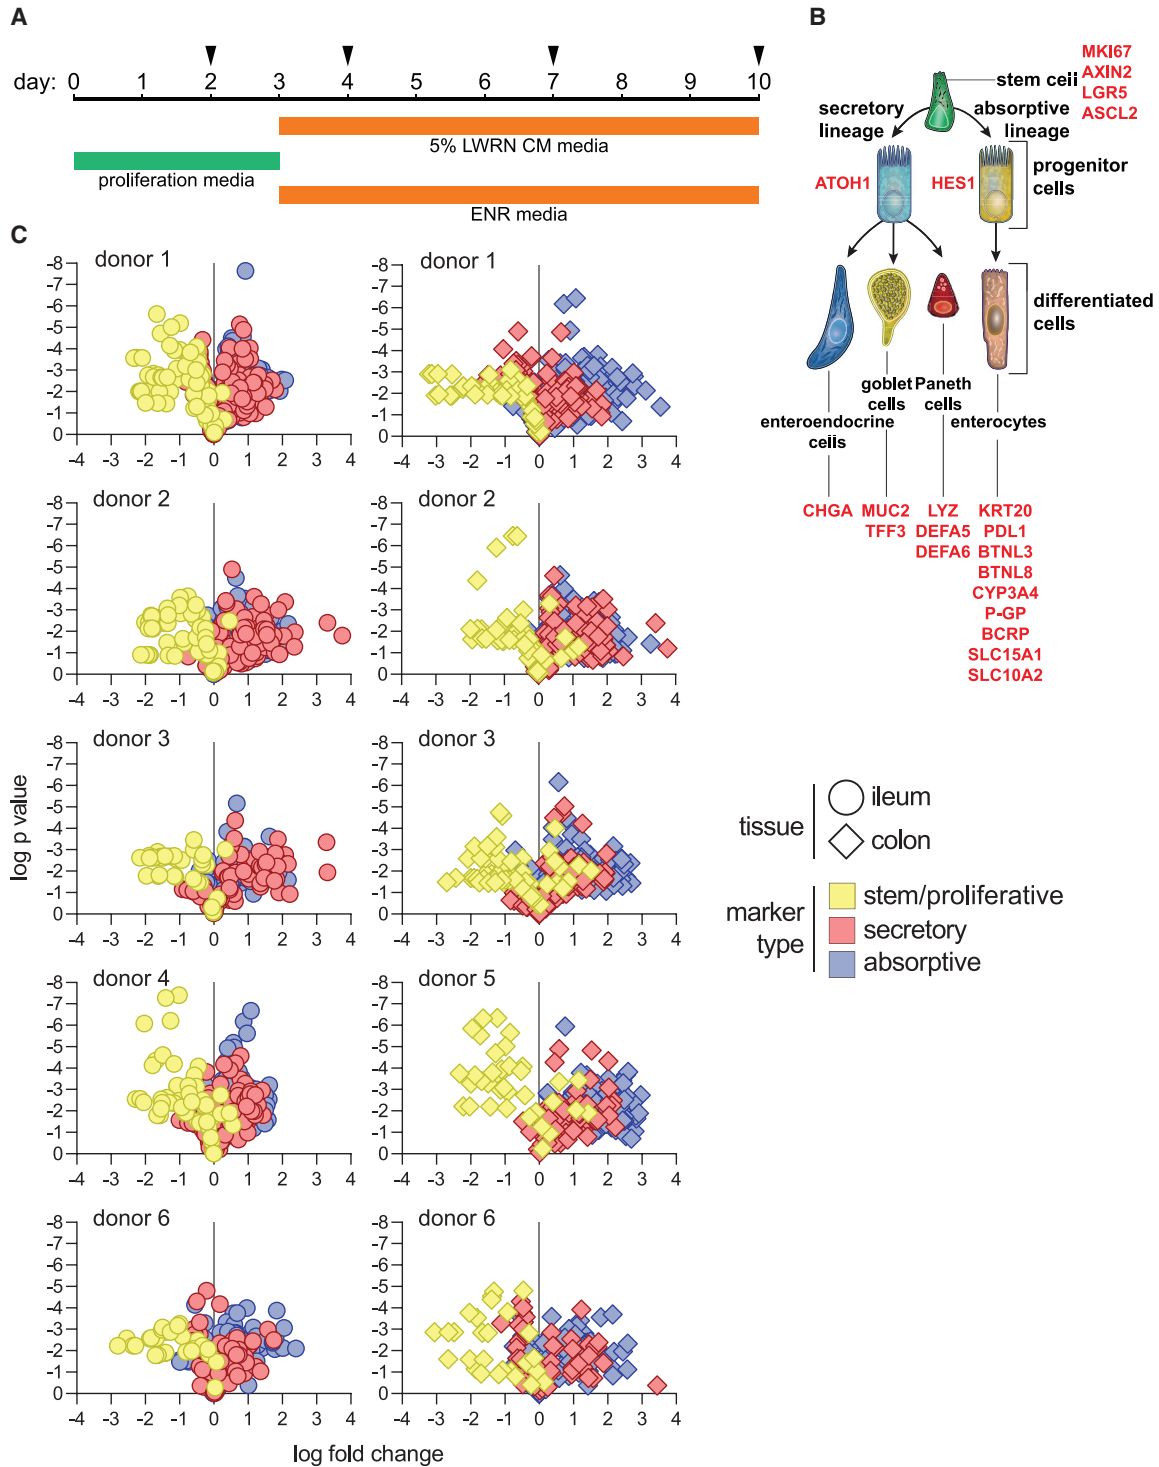

**Figure 1. Consistent differentiation of ileum- and colon-derived ASC organoids**

(A) Schematic for time courses. Cultures were maintained for 10 days in total, switching to differentiation medium on day 3. Samples were collected on days 2, 4, 7, and 10. Day-2 cultures, maintained only in proliferation medium, were used as a baseline for gene expression in subsequent analysis.

(B) Stem/proliferative, secretory, and absorptive cell markers used to assess differentiation.

(legend continued on next page)

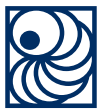

of thoroughly characterizing human ASC organoid cultures with a diverse set of assays. Heterogeneity is an inherent and appropriate feature of human ASC organoid cultures, but we show that variability could be managed to yield robust and interpretable datasets.

## RESULTS

### Assessing developmental gene expression patterns

Gut ASC organoid cultures were established by isolating crypts from human intestinal tissue as previously described (Miyoshi and Stappenbeck, 2013; Sato et al., 2011a). Cultures were derived from ileum and/or colon of donated cadaver tissues from six adult donors of diverse ages and ethnicities (Table S1). Both ileum and colon cultures were established from all donors except donors 4 (ileum only) and 5 (colon only). Median age and body mass index were 31.5 (range: 18–47) years and 27 (range: 19.7–32.9) kg/m<sup>2</sup>, respectively (summarized in Table S1).

These ASC cultures were grown in proliferation medium for 2 days and switched to two types of differentiation medium on day 3. Certain growth factors were removed (ENR medium [Sato et al., 2011a]) or reduced (5% L-WRN medium [Miyoshi and Stappenbeck, 2013]) to induce differentiation of cultures. Because of both technical and potential impact on signaling pathways, both media formulations were included (for details see supplemental experimental procedures).

Samples were collected at days 2, 4, 7, and 10 after the initiation of ASC organoid cultures (Figure 1A). Multiple time courses (2–3 per culture spanning several passages) were carried out for each culture to assess inter- and intradonor variability. Furthermore, isolated crypts that were used to initiate cultures were included for the comparison of ASC organoid cultures with original tissue. Overall, 26 time-course assays were carried out, generating 556 RNA samples, leading to 13,344 qPCR observations.

Differentiation status of cultures was assessed using qRT-PCR, focusing on expression of developmental genes (Figure 1B; markers/probes are listed in Table S2). We designed a qPCR panel containing markers of stem/proliferative, secretory, and absorptive cells (Figure 1B). *MKI67*, *LGR5*, *ASCL2*, and *AXIN2* were used as markers for proliferative and stem cells (Barker et al., 2007; Bullwinkel et al., 2006; Jho et al., 2002; Li et al., 2016; van der Flier et al., 2009).

*ATOH1* and *HES1* were included as markers of secretory and absorptive progenitors, respectively (Gehart and Clevers, 2019). Additionally, markers for predominant functional secretory cell types were included: *CHGA* for enteroendocrine cells (Engelstoft et al., 2015), *MUC2* and *TFF3* for goblet cells (Pelaseyed et al., 2014), and *LYZ*, *DEFA5*, and *DEFA6* for Paneth cells (Gassler, 2017). Several enterocyte markers were analyzed: *CYP3A4*, *PGP*, *BCRP*, *SLC15A1*, and *SLC10A2* (International Transporter et al., 2010; Kaminsky and Zhang, 2003) were included as metabolic and absorptive markers and *KRT20*, *PDL1*, *BTNL3*, and *BTNL8* were included as structural and intercellular signaling molecules (Di Marco Barros et al., 2016; Moll et al., 1990).

### Consistent developmental pathway gene expression patterns among donors

To assess the differentiation potential of cultures, we compared later time points (more differentiated) with an early time point (more stem/proliferative). Transcript levels of the markers were examined, comparing days 4, 7, and 10 with day 2 and visualized on a volcano plot. This analysis showed that stem/proliferative cell markers were downregulated over time whereas secretory and absorptive cell markers were upregulated (Figure 1C). Importantly, ileum- and colon-derived cultures behaved similarly. This developmental pattern was shared among all cultures analyzed, indicating that differentiation potential was similar for all cultures.

The proliferation marker *MKI67* was downregulated as cultures differentiated. Additionally, previously described adult intestinal stem cell markers *LGR5*, *ASCL2*, and *AXIN2* followed a similar pattern (Figure 2A). This pattern points to a shift to a mitotically arrested state over time, which is indicative of enrichment for terminally differentiated cells. *ASCL2* gene expression was challenging to detect in all samples. Starting transcript levels were relatively low (day-2 C<sub>t</sub> value 32.0 ± 2.46 for *ASCL2* versus 25.9 ± 1.52 for *LGR5*, 23.6 ± 1.50 for *AXIN2*, and 21.8 ± 1.63 for *MKI67*; Figure S1A), making reliable detection difficult as gene expression was downregulated over time. Therefore, this marker was excluded from subsequent analysis. The overall expression pattern for stem and proliferative cell markers was similar for ileum and colon cultures (Figure S1A). Comparing ASC organoids and original tissue, expression

(C) Assessing differentiation for each culture and donor. A ratio of gene expression (qPCR analysis) on day 4, 7, or 10 to gene expression on day 2 was calculated for each marker. Data were visualized as volcano plots for each culture, representing p value versus fold change in gene expression. Both ileum and colon cultures were present for all donors except for donor 4 (ileum only) and donor 5 (colon only). Each individual culture was analyzed using 2–3 independent time courses (details outlined in experimental procedures); each time course included three cell-culture (technical) replicates. Gray vertical lines represent fold change of 1. Circles represent ileum cultures and diamonds represent colon cultures. Each symbol represents a marker for one sample (distinct replicate and time point). Colors represent each class of cell types (stem/proliferative, secretory, or absorptive) assessed.

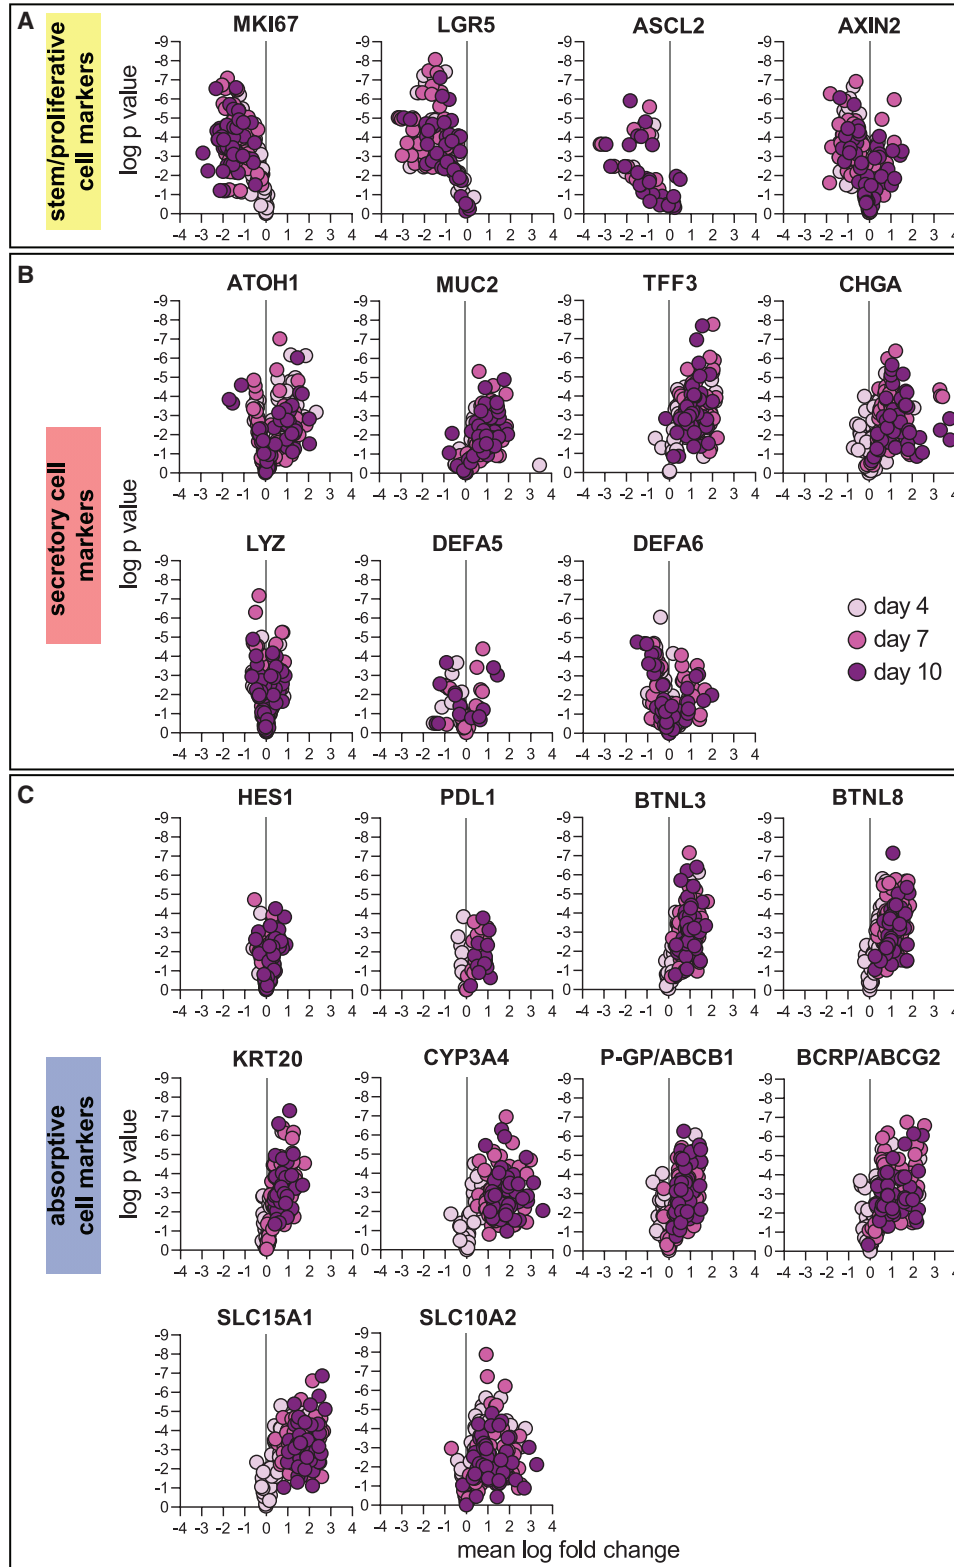

(legend on next page)

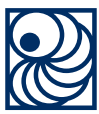

of stem and proliferative markers was similar (Figures S1A and S1D), although *LGR5* expression was lower in ASC organoid cultures (average values in ileum: 0.0197 in ASC organoids, 0.302 in tissues; average values in colon: 0.0543 in ASC organoids, 0.167 in tissues).

Goblet and enteroendocrine cell markers *MUC2*, *TFF3*, and *CHGA* increased in expression as cultures developed, indicating the presence of these cells in well-differentiated cultures (Figure 2B). Expression of goblet cell markers was similar when comparing ileum and colon cultures (Figure S1B). Additionally, the expression pattern in ASC organoids and human tissue was similar (Figures S1B and S1E). The increase in expression for Paneth cell markers *LYZ*, *DEFA5*, and *DEFA6* was not dramatic. Appropriately, Paneth cell markers were detected at a lower level in colon cultures than in ileum cultures (Figure S1B), consistent with the presence of Paneth cells in the small intestine but not colon (Clevers and Bevins, 2013). Tissue expression of Paneth cell markers was as expected: higher expression of all markers was observed in ileum (Figure S1E). Importantly, expression of *DEFA5* and *DEFA6* was higher in tissue than in ASC organoids. This result suggests that media conditions used were not conducive to the robust formation of Paneth cells, similar to previous results (Mead et al., 2018).

To assess the development of enterocytes, we determined the expression of several markers. Structural and signaling molecules *KRT20*, *PDL1*, *BTNL3*, and *BTNL8* increased expression over time (Figure 2C) and did not display distinct ileum-colon expression patterns (Figure S1C). Additionally, we quantified the expression of molecules important for metabolism and transport. Expression of *CYP3A4* was examined, as cytochrome P450 enzymes are important for intestinal metabolism. Expression of *CYP3A4* increased dramatically over time in all cultures (Figure 2C). *CYP3A4* expression was higher in ileum cultures than in colon cultures (Figure S1C), reflecting the metabolic function of the small intestine, as has been observed previously (McKinnon et al., 1995). Additionally, the expression of ATP-binding cassette family transporters *PGP* and *BCRP* was upregulated over time (Figure 2C), showing little ileum-colon expression difference (Figure S1C). Similarly, the expression of solute transporters *SLC15A1* and *SLC10A2* was upregulated considerably over time (Figure 2C). The expression of both solute transporters was higher in ileum cultures (Figure S1C), once again emphasizing the importance of the small intestine as the major site of nutrient transport. Interestingly, while

expression levels for enterocyte markers were broadly similar in ASC organoids (Figure S1C) and original tissue (Figure S1F), ileum-colon polarity was lost for some transcripts. This was most apparent in transporters where *PGP*, *BCRP*, and *SLC15A1* were more highly expressed in ileum in original tissue but not in ASC organoids, whereas *SLC10A2* maintained its pattern of higher expression in ileum-derived ASC organoids.

### Quantifying inter- and intra-donor variability during epithelial cell differentiation

We determined the extent of variability among cultures using principal component and correlation analysis. Gene expression data generated by qPCR for developmental pathway analysis for both ASC organoids and original human tissue (discussed in Figures 1 and 2) were used. All data points were analyzed on the basis of six features: tissue (ileum versus colon), donors, day of RNA harvest, medium type, culture passage number, and replicates. Principal component analysis (PCA) showed that samples collected on each day of time-course experiments clustered together (Figures 3A and 3B). Importantly, culture development and differentiation could be traced along principal component 1 (PC1), which captures most variation in data. Day-2 samples (highly proliferative/homogeneous stem cultures) clustered away from day 7 and day 10 (highly differentiated/heterogeneous cultures) samples. Day-4 samples, which represent an intermediate state between proliferative/stem and differentiated cultures, fell between day-2 and day-7/10 samples along PC1. Additionally, day-7 and day-10 samples clustered closely, indicating that little further differentiation occurs after day 7. This analysis clearly showed that differentiated cultures were transcriptionally distinct from proliferative cultures. Importantly, original tissue samples clustered with day-2 ASC organoid samples (Figures 3A and 3B). Original tissue samples consisted of isolated crypts, where proliferative cells are located in the intestinal gland, making this observation biologically appropriate.

Variability among donors was examined next. On PCA plots, little clustering was observed when ileum and colon samples were colored according to originating donor (Figures 3C and 3D), suggesting that differences among donors is not a major driver of variability. Next, we sought to quantify the extent of similarity among ASC organoid cultures. To quantify similarity among donors, we employed Pearson correlation analysis. When comparing gene expression

### Figure 2. Regulation of stem/proliferative, secretory, and absorptive cell markers

Expression of each stem/proliferative (A), secretory (B), and absorptive (C) markers is shown as a ratio of day 4, 7, or 10 to day 2 as presented in Figure 1C. Plots are colored according to time point (darker colors are later time points) and each symbol represents a separate sample (distinct donor, replicate). As in Figure 1C, 2–3 time courses are presented for each culture, and each time-course experiment includes three cell-culture (technical) replicates. All gene expression analyses were performed by qPCR.

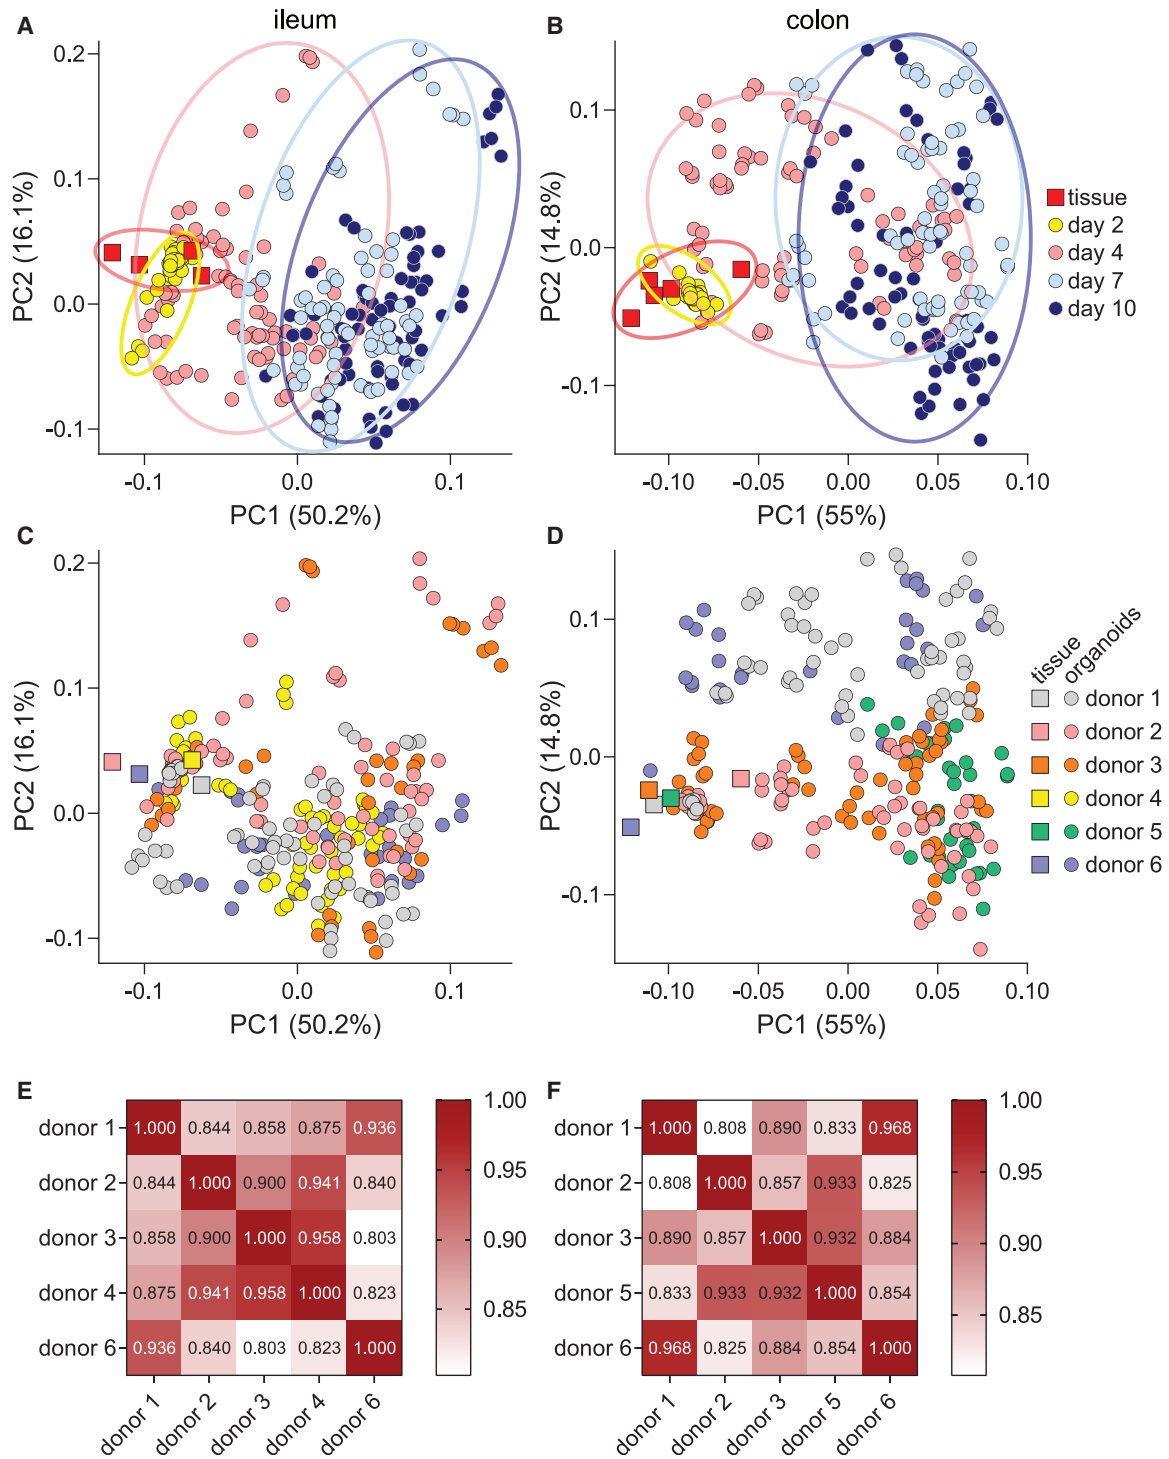

**Figure 3. Quantifying variability among donors**

Principal component analysis of both ileum and colon ASC organoid cultures (circles) and isolated human crypts (squares). Samples are marked by day of harvest (A and B) or donor identity (C and D). Percent variance for each principal component (PC) is reported in parentheses. Each symbol represents a separate RNA sample analyzed by qPCR. Correlation matrices comparing gene expression patterns in differentiated cultures (day 7) are presented in (E) and (F).



patterns in differentiated (day-7) ASC organoids, a high degree of correlation was observed (Figures 3E and 3F). Correlation coefficients ranged from 0.803 to 0.958 for ileum cultures and from 0.808 to 0.968 for colon cultures. The high degree of correlation suggests that cultures broadly behave similarly when differentiated. This is an important outcome, indicating the likely generalizability of results produced in this culture system.

Additional variables among cultures were examined using PCA. As expected, samples incubated in the same medium clustered together (Figure S2A)—that is, samples grown in proliferation medium clustered together and samples grown in either differentiation medium clustered together. These results recapitulate findings from time-based PCA plots (Figures 3A and 3B). Additionally, this analysis shows that there is little difference between 5% L-WRN conditioned medium and ENR differentiation medium with respect to developmental pathways. Importantly, little clustering was observed when comparing samples over several passages and cell-culture replicates, suggesting minimal intra-donor variability (Figures S2B and S2C).

### Expression of inflammatory immune receptors is developmentally controlled

To evaluate the potential for modeling inflammatory diseases in ASC organoid cultures, we quantified the expression of immune receptors that initiate proinflammatory signaling pathways in proliferative and differentiated ASC organoid cultures. We focused on receptors for interferons (IFNs) and tumor necrosis factor (TNF), as they have been implicated as important drivers of inflammatory gut indications (Andreou et al., 2020; Delgado and Brunner, 2019; Neurath, 2019). The expression of type I (*IFNAR1* and *IFNAR2*), type II (*IFNGR1* and *IFNGR2*), and type III (*IFNLR1* and *IL10R2*) IFN receptors as well as two TNF receptors (*TNFR1* and *TNFR2*) was quantified. Interestingly, receptor expression was higher in differentiated cultures than in proliferative cultures (Figure 4A). This pattern was consistent among the three donors analyzed, suggesting that this phenomenon is generalizable. This pattern held true for type I (Figure 4B), type II (Figure 4C), and type III (Figure 4D) IFN receptors as well as TNF receptors (Figure 4E). These findings highlight the importance of thorough characterization of immune receptor expression prior to challenging cells with cytokines or pathogens.

IFN receptors did not show a statistically significant ileum-colon culture expression bias (Figures S3A–S3C). TNF receptors appeared to be more highly expressed in ileum cultures (Figure S3D). *TNFR1* expression was indeed significantly higher in ileum cultures ( $p = 0.0008$ ), whereas the difference for *TNFR2* expression was not statistically significant ( $p = 0.0997$ ). Robust and reproducible expres-

sion of IFN and TNF receptors indicate that this ASC organoid system is suitable for modeling intestinal inflammatory disease *in vitro*.

### Markers of functional intestinal cells are detected at protein level

The presence and fractions of functional cell types in ASC organoid cultures were determined using immunofluorescence microscopy (Figure 5). Differentiated cultures (day 7) were fixed and markers of Paneth (lysozyme), goblet (mucin 2), and enteroendocrine (chromogranin A) cells were detected. Structural proteins actin and E-cadherin were detected as markers of apical microvilli and cell junctions, respectively. This analysis showed that ASC organoids formed polarized structures with apical surfaces facing the lumen, as expected. Additionally, uniform E-cadherin staining was detected, indicating the formation of tight barrier surfaces. Finally, lysozyme, mucin 2, and chromogranin A were detected in cultures, confirming the presence of secretory cells in day-7 cultures (Figure 5A). Importantly, bright-field imaging confirmed the presence of a healthy epithelium as cultures differentiated (Figure S4). Next, the fraction of each cell type was quantified in both ileum- and colon-derived differentiated ASC organoids from several ( $n = 3$ ) donors (Figure 5B). Goblet cell marker mucin 2 and enteroendocrine cell marker chromogranin A were detected at relatively high rates, whereas Paneth cell marker lysozyme occurred at much lower rates. These data indicate that while culture conditions are conducive to the formation of goblet and enteroendocrine cells, additional pathway modulators would have to be included in the culture media to increase the proportions of Paneth cells. Importantly, the staining patterns and cell proportions were consistent among the three donors examined, indicating that differentiation patterns among ASC organoid cultures are uniform.

### Ileum- and colon-derived ASC organoids secrete serotonin, GLP1, and PYY

The intestine is an important endocrine tissue, and gut hormones play key roles in satiety, glucose homeostasis, and nutrient absorption (Ahlman and Nilsson, 2001; Martin et al., 2019; Worthington et al., 2018). However, cell-culture systems to study gut hormone production and secretion *in vitro* have not been readily available. Thus, we quantified hormone secretion by differentiated ileum and colon ASC organoids (day 7 post seeding, stimulated as described in experimental procedures) derived from three donors. As enteroendocrine cell markers were robustly detected (Figures 2 and 5), we decided to assess their function by measuring levels of secreted serotonin, PYY, and GLP1. The secretion of all three hormones was detected for all donors (Figure 6). Serotonin secretion was

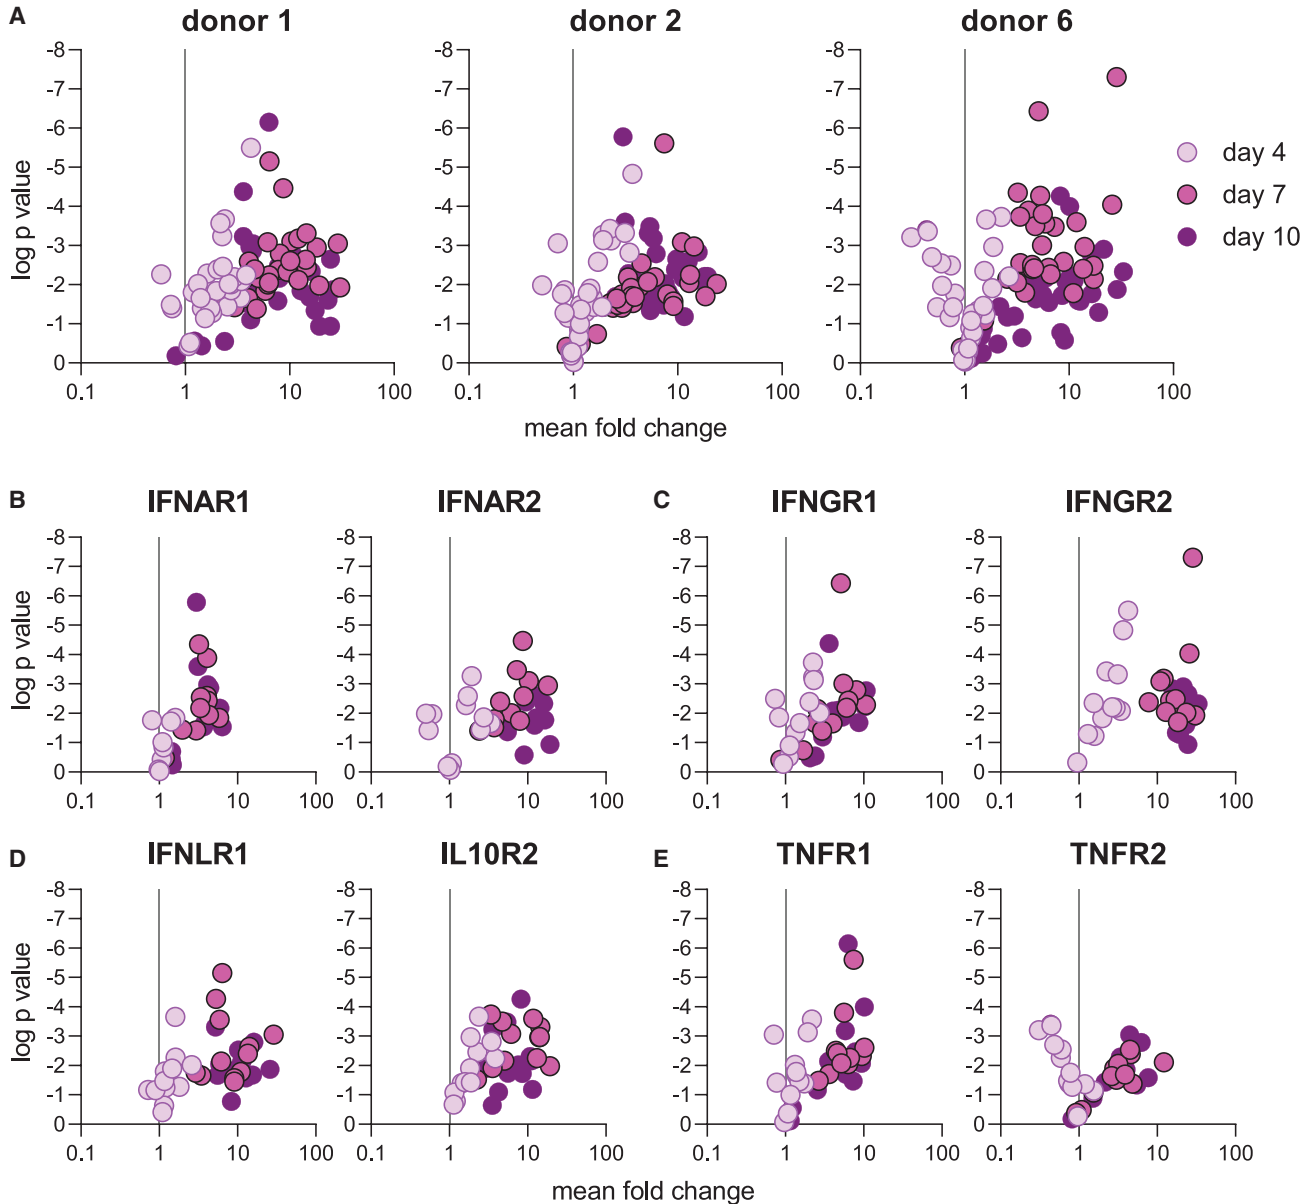

**Figure 4. Expression of inflammatory immune receptors is developmentally controlled**

(A) qPCR was used to assess expression of IFN and TNF receptors in three donors and is displayed as a ratio of day 4, 7, or 10 to day 2 as presented in Figure 1C. Plots are colored according to time point (darker colors are later time points) and each symbol represents a separate sample (distinct tissue, time point, and replicate). One time course per donor was included. Each time course included three cell-culture (technical) replicates.

(B–E) Expression of type I (B), type II (C), and type III (D) interferon and TNF (E) receptors, plotted in similar manner to Figure 2. Plots are colored according to time point (darker colors are later time points) and each symbol represents a separate sample (distinct donor, replicate).

consistently detected more highly in colon cultures than in ileum cultures (Figure 6A). Compared with untreated cultures, serotonin secretion increased by 1.1-fold (ileum) or 7.5-fold (colon). GLP1 secretion was robustly detected in all cultures as well (Figure 6B). While both ileum and colon

cultures secreted GLP1, the magnitude of secretion varied. Ileum cultures displayed an average 7.4-fold induction over untreated cultures while colon cultures displayed a 22.7-fold increase. Interestingly, the basal levels of GLP1 were lower in colon cultures than in ileum cultures. Finally,



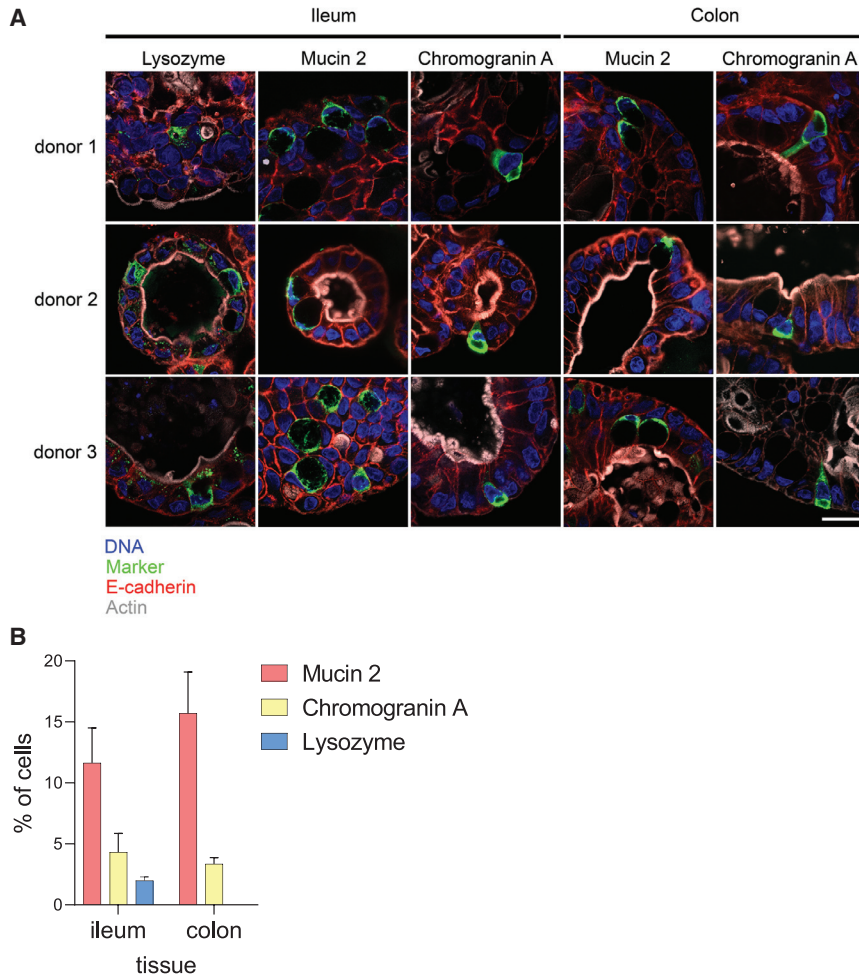

**Figure 5. Immunofluorescence imaging to confirm presence of differentiated cells**

(A) Differentiated ASC organoids (harvested at day 7 as outlined in Figure 1) from three donors were fixed, and markers of mature intestinal cells were detected using confocal microscopy. Pseudocoloring is as follows: blue, DNA; green, lysozyme, mucin 2, or chromogranin A; red, E-cadherin; gray, actin. Scale bar, 20  $\mu$ m (applies to all panels).

(B) Quantification of cell-type markers. Differentiated (day 7) ileum and colon cultures from three donors were stained for lysozyme (Paneth cell marker, ileum cultures only), mucin 2 (goblet cell marker, ileum and colon cultures), chromogranin A (enteroendocrine cells, ileum and colon cultures), and DNA. Fraction of each cell type present was calculated by counting marker-positive cells among hundreds of total cells (>500 cells for all samples and markers except for lysozyme staining in donor 2 [307 cells] and donor 3 [473 cells] cultures). Data are presented as percentage of total cells positive for a given cell-type marker.

secretion of PYY was detected in all cultures (Figure 6C). While the basal and stimulated levels of PYY were higher in colon than in ileum, the magnitude of induction upon stimulation was similar (5.7-fold for both ileum and colon cultures). This is consistent with higher colon PYY expression levels *in vivo* (Zhou et al., 2006). Importantly, all three donors analyzed in this experiment behaved similarly, suggesting that enteroendocrine cell function is consistently observed in ASC organoid cultures. Taken together, these data demonstrate that ASC organoid cultures faithfully recapitulate physiological conditions for hormone secretion.

### Central carbon metabolism changes during ASC organoid differentiation

Central carbon metabolism is a complex enzyme-mediated network that converts sugars into precursors for metabolism. Targeted metabolomics analysis of the ileum- and colon-derived ASC organoids assessed the metabolic differences of differentiated ASC organoids compared with stem-

cell-enriched cultures. Using triple quadrupole liquid chromatography-mass spectrometry, 108 central carbon metabolites were profiled at three time points (2, 4, and 7 days after initial plating) for ileum- and colon-derived ASC organoids from five and four donors, respectively. For each tissue type, metabolite concentrations were compared between donors at each time point. PCA results (Figures 7A and 7B) indicated minimal metabolic donor-to-donor variability as donors for a particular time point tended to cluster together. This robust clustering pattern indicated that the metabolic state of cultures is consistent. Clear differences in metabolism were evident between each day, as indicated by separate clusters for each time point. These metabolic trends were consistent in both ileum- and colon-derived ASC organoids.

To better understand the changes in central carbon metabolism during ASC organoid development, we visualized significantly different metabolites ( $p < 0.05$ , one-way ANOVA) by volcano plot (Figures 7C and 7D). L-citrulline, creatine, riboflavin, and L-glutathione (oxidized) were

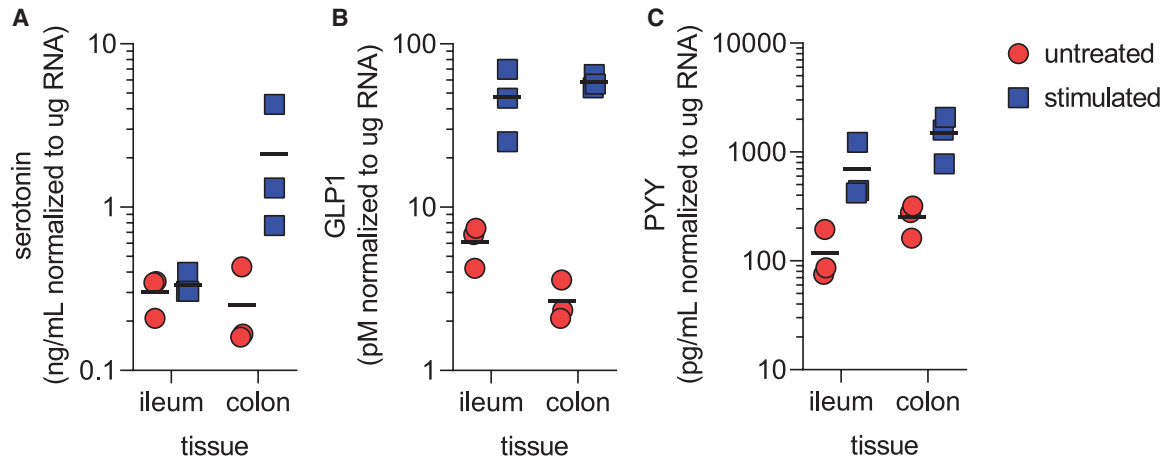

**Figure 6. Ileum- and colon-derived ASC organoids secrete serotonin, GLP1, and PYY**

Secretion of serotonin (A), GLP1 (B), and PYY (C) by ileum- and colon-derived ASC organoid cultures. Cultures were stimulated overnight by 10  $\mu$ M forskolin, 10  $\mu$ M IBMX, and 10 mM glucose, and hormone amounts were quantified by ELISA. Cultures from three donors were analyzed, and experiments were performed with four cell-culture (technical) replicates. Each symbol in the figure represents the average of cell-culture replicates for each donor culture analyzed.

among the list of significantly differential metabolites between days 2 and 7. Enrichment analysis (Figures 7E and 7F) revealed that amino acid metabolism—specifically glycine/serine/threonine pathway and arginine/proline pathway—was affected by differentiation to mature ileum- and colon-derived ASC organoids.

The change in abundance of several of these metabolites is consistent with metabolism in these tissues in the human body. For example, the relative abundance of L-citrulline increased nearly 10-fold in ileum-derived ASC organoids from day 2 to day 7. This result is consistent with previous studies, which have demonstrated a role for citrulline in intestinal function and that absorption of citrulline occurs in the middle to lower ileum (Fragkos and Forbes, 2018; Vadgama and Evered, 1992). Riboflavin, which significantly increased from day 2 to day 7 in both colon- and ileum-derived ASC organoids, has previously been shown to be absorbed in the small intestine (Feder et al., 1991; Hegazy and Schwenk, 1983). Flavin adenine dinucleotide, which is in the same metabolic pathway as riboflavin, also increased in both ASC organoid types. Taken together, our data suggest that the metabolic profiles detected in these ASC organoid cultures are consistent with what is known about their physiological functions. Nevertheless, to more precisely determine the ability of these ASC organoids to recapitulate tissue metabolism, additional experiments are warranted.

## DISCUSSION

The advent of three-dimensional ASC organoid models allows for *in vitro* modeling of human tissue, providing a

more physiologically relevant system than traditional tissue culture. One concern about these systems is the level of variability that may be observed from culture to culture. Here we have described the characterization of ileum and colon ASC organoids derived from various donors. We have demonstrated similar levels of epithelial cell differentiation among donors regardless of medium used for differentiation or passage number of the culture. Critically, donor-to-donor variability was minimal.

The ASC organoid cultures examined here differentiate on a time scale that matches the human gut epithelium. Within a few days differentiation is complete, as indicated by the overlap between gene expression signatures at days 7 and 10 (Figure 3). Importantly, only markers of enterocytes, goblet, Paneth, and enteroendocrine cells could be detected (Figures 1, 2, and 5); rarer cell types such as tuft and microfold cell markers were not detected (data not shown). This finding is consistent with previous work showing that differentiation toward rare cell-type lineages requires the addition of specific cytokines (Boonekamp et al., 2020).

Curiously, expression of Paneth cell markers was observed in colon cultures (Figure S1). While Paneth cell marker expression levels were higher in ileum cultures, colon culture expression was not absent. This observation could be explained by the complex nature of marker expression. Recent single-cell analysis publications (Parikh et al., 2019; Smillie et al., 2019; Wang et al., 2020) have highlighted the fact that gradients of marker expression exist in each cell type. Additionally, Paneth-like cells have been identified in the human colon (Wang et al., 2020), indicating that Paneth cell marker expression may represent this cell type.

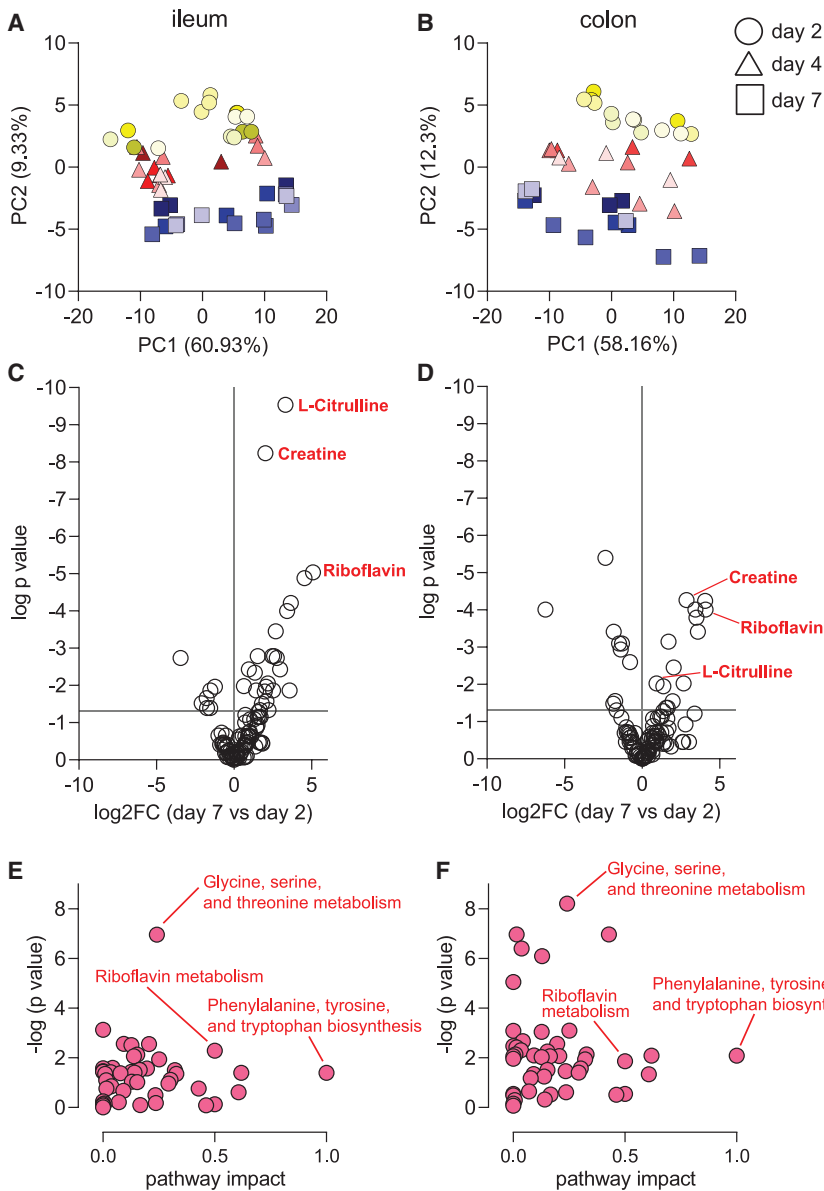

**Figure 7. Metabolomics analysis of ASC organoid cultures**

(A and B) Principal component analysis of central carbon metabolites in ileum-derived (A) and colon-derived (B) ASC organoids. Percent variance for each principal component (PC) is reported in parentheses. Each symbol represents a cell-culture replicate, and shading represents different donors. Symbols with the same shading are cell-culture (technical) replicates. Five ileum culture donors and four colon culture donors are represented, each containing three cell-culture (technical) replicates.

(C and D) Abundance of metabolites presented as ratio of day-7 abundance to day-2 abundance for ileum-derived (C) and colon-derived (D) ASC organoids.

(E and F) Pathway analysis for metabolite abundance with key pathways (D, ileum-derived; E, colon-derived) highlighted.

Overall, Paneth cell differentiation was not very efficient in our organoid cultures (Figures 2, S1, and 5). It is known that both Wnt and Notch signaling pathways control Paneth cell differentiation (Sato et al., 2011b). The differentiation media conditions used in this study did not include Wnt and Notch modulators, which likely explains the modest increase in Paneth cell markers. While Paneth cells are observed in low quantities (Figure 5), increased representation of this cell type would be enhanced by adding exogenous Wnt agonists and Notch antagonists to the media, as previously described (Mead et al., 2018; Yin et al., 2014).

We show that differentiation is remarkably consistent among cultures. Appropriately, gene expression patterns are fairly uniform at early time points (denoted by a tight

cluster colored in yellow: Figures 3A and 3B), reflecting homogeneity of stem/proliferative cells in the intestine. As cultures differentiate over time, gene expression patterns become less uniform (pink and blue symbols in Figures 3A and 3B), which is indicative of expected cell-type heterogeneity in terminally differentiated intestinal cells. This pattern is reminiscent of the “epigenetic landscape” described by Waddington (Goldberg et al., 2007). Our data nicely depict the widening of cell-fate trajectories as cultures differentiate to generate functional cells.

Our gene expression analysis highlighted region-specific expression patterns for certain transcripts. These included Paneth cell markers *LYZ*, *DEFA5*, and *DEFA6* and enterocyte markers *CYP3A4*, *PGP*, *BCRP*, *SLC15A1*, and *SLC10A2*



(Figures S1E and S1F). This pattern represents expected intestinal biology: Paneth cells are not typically present in the colon (Clevers and Bevins, 2013; Gassler, 2017), and the small intestine is the major site for transport and first-pass metabolism (International Transporter et al., 2010; Kato, 2008). It has been shown previously that regional gene expression patterns are maintained in gut organoid cultures (Middendorp et al., 2014). We observed that regional gene expression patterns were largely maintained for transcripts that displayed an ileum-colon expression bias. However, some transcripts lost ileum-colon expression bias (transporters *PGP*, *BCRP*, and *SLC15A1*). These results suggest that regional expression patterns *in vivo* are governed by specific factors that are absent in a neutral selection condition such as the medium used to culture ASC organoids. Factors controlling regional expression patterns have not been defined but could include signals from the luminal microbial community, immune cells in lamina propria, or other to-be-defined signals originating from serosal sources.

Large variability in primary culture systems could lead to uninterpretable results. This requires meticulous quantification of various sources of variability, leading to an understanding of noise in the experimental system. We found that among several variables—donors, differentiation media used, passages, and cell-culture replicates—variability was manageable (Figure 3). This information indicates that cultures behave similarly during the differentiation process and over multiple passages, thereby enabling robust experimental design.

Given that hormone production and secretion is a critical function of the human intestine, we investigated endocrine cell function in ASC organoids. The gut is often referred to as the largest endocrine tissue in the human body (Ahlman and Nilsson, 2001), producing many hormones that regulate a range of metabolic functions in the intestine and throughout the body. The ASC organoid cultures examined for this work effectively produced and secreted GLP-1 and PYY (Figure 6), which work in concert with pancreatic hormones to regulate blood glucose levels (Gribble and Reimann, 2019; Worthington et al., 2018). Additionally, we showed that ASC organoid cultures produced and secreted serotonin (Figure 6). Serotonin plays important roles in the intestine by regulating peristalsis, vasodilation, and pain perception (Mawe and Hoffman, 2013; Spohn and Mawe, 2017). In addition to regulating metabolic and intestinal functions, these hormones have been implicated in various diseases. For example, GLP-1, PYY, and serotonin levels change during inflammatory bowel disease, and serotonin is thought to act as a proinflammatory molecule in celiac disease (Worthington et al., 2018). Furthermore, recent work has uncovered a novel mechanism through which intestinal microbes

induce serotonin secretion (Sugisawa et al., 2020). Intestinal ASC organoids provide a robust *ex vivo* platform to identify modulators of endocrine cell function. These modulators will be important for studying disease processes as well as basic intestinal function.

We observed differential production of central carbon metabolites at various time points of culture differentiation. As the cultures differentiated, there was an increase in L-citrulline, creatine, and riboflavin. This represents the metabolites being utilized by the cells present in this heterogeneous population. While this targeted approach yields interesting reproducible information about central carbon metabolism, future studies could take an untargeted approach to find out whether additional metabolites can be detected in a reproducible manner. The results could indicate the ratio of a particular cell population or unique metabolic pathways that play important roles in the intestine.

In this work, we have characterized variability in primary human intestinal ASC organoids and have demonstrated that donor-to-donor variation is minimal. Additionally, we have shown that the cell-culture system recapitulates key features of the originating tissue. Identifying and characterizing the cell state for primary cell cultures is important for developing robust applications. Without thorough characterization, assay results will be difficult to interpret. Brought together, thorough characterization of cell state and functional cell information lead to successful application of this primary cell platform to ask fundamental biological questions and to advance therapeutic discovery.

## EXPERIMENTAL PROCEDURES

For complete details, see [supplemental experimental procedures](#).

### ASC organoid culture growth and differentiation

Intestinal organoid cultures were established as previously described (Miyoshi and Stappenbeck, 2013; Sato et al., 2011a). Cultures were maintained in proliferation medium (50% L-WRN conditioned medium + Y27632 + SB431542) for routine passaging. To induce differentiation, we changed the culture medium to either a serum-containing medium (5% L-WRN conditioned medium with no Y27632 or SB431542) or a defined medium (base medium containing EGF, Noggin, and R-spondin) 3 days after organoids were plated.

### Transcriptional and immunofluorescence microscopy analysis

At indicated time points, cells were harvested for RNA purification and qPCR analysis. For immunofluorescence analysis, organoids were removed from Matrigel using cell-recovery solution (Corning) and fixed using 4% paraformaldehyde. After permeabilization and blocking, organoids were incubated overnight in antibodies targeting differentiated cell markers, followed by secondary antibody staining. Stained organoids were mounted onto slides and imaged using confocal microscopy.

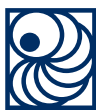

## Principal component and correlation analysis

PCA was carried out using R. The results were visualized using GraphPad Prism. Pearson correlation analysis was performed using R, including only samples from the day-7 time point. The correlation matrix was visualized using GraphPad Prism.

## Hormone secretion assay

Hormone secretion was induced in differentiated organoids (7 days post plating). In brief, secretion was induced by adding forskolin, 3-isobutylmethylxanthine (IBMX), and glucose to culture medium and analyzing supernatants after overnight incubation using kits to detect secreted PYY, GLP1, and serotonin.

## Metabolomics analysis

Metabolites in organoids cultured for 2, 4, or 7 days were analyzed by mass spectrometry. Organoids were removed from Matrigel using Cell Recovery Solution (Corning) and extracted with acetonitrile/methanol/water. After homogenization, organoids were extracted for 10 min at  $-20^{\circ}\text{C}$  and centrifuged. Supernatants were dried under nitrogen and dissolved in water/methanol for mass spectrometry analysis.

## SUPPLEMENTAL INFORMATION

Supplemental information can be found online at <https://doi.org/10.1016/j.stemcr.2021.07.016>.

## AUTHOR CONTRIBUTIONS

Conceptualization, S.M. and L.A.L.; methodology, S.M., T.P.W., and C.H.W.; software and formal analysis, C.H.W.; investigation, S.M., C.M.-P., C.W.W., T.P.W., and L.A.L.; data curation, S.M., T.P.W., C.H.W., T.R.S., and L.A.L.; writing – original draft, S.M. and L.A.L.; writing – review & editing, all authors; visualization, S.M., T.P.W., C.H.W., and T.R.S.; supervision, L.A.L.; project administration, S.M. and L.A.L.

## CONFLICTS OF INTEREST

All authors were employees of Merck Sharp & Dohme Corp., a subsidiary of Merck & Co., Inc., Kenilworth, NJ, USA, at the time this work was performed.

## ACKNOWLEDGMENTS

We thank Erik Hett, Alex Therien, and Daria Hazuda for constructive comments on the manuscript and continued support. We thank Sharon O'Brien for the illustration in Figure 1B. Funding was provided by Merck Sharp & Dohme Corp., a subsidiary of Merck & Co., Inc., Kenilworth, NJ, USA.

Received: December 23, 2020

Revised: July 26, 2021

Accepted: July 27, 2021

Published: August 26, 2021

## REFERENCES

- Ahlman, H., and Nilsson. (2001). The gut as the largest endocrine organ in the body. *Ann. Oncol.* *12*, S63–S68.
- Andreou, N.P., Legaki, E., and Gazouli, M. (2020). Inflammatory bowel disease pathobiology: the role of the interferon signature. *Ann. Gastroenterol.* *33*, 125–133.
- Barker, N., van Es, J.H., Kuipers, J., Kujala, P., van den Born, M., Cozijnsen, M., Haegbarth, A., Korving, J., Begthel, H., Peters, P.J., et al. (2007). Identification of stem cells in small intestine and colon by marker gene *Lgr5*. *Nature* *449*, 1003–1007.
- Bartfeld, S. (2016). Modeling infectious diseases and host-microbe interactions in gastrointestinal organoids. *Dev. Biol.* *420*, 262–270.
- Boonekamp, K.E., Dayton, T.L., and Clevers, H. (2020). Intestinal organoids as tools for enriching and studying specific and rare cell types: advances and future directions. *J. Mol. Cell Biol.* *12*, 562–568.
- Bullwinkel, J., Baron-Luhr, B., Ludemann, A., Wohlenberg, C., Gerdes, J., and Scholzen, T. (2006). Ki-67 protein is associated with ribosomal RNA transcription in quiescent and proliferating cells. *J. Cell. Physiol.* *206*, 624–635.
- Chen, C., Yin, Y., Tu, Q., and Yang, H. (2018). Glucose and amino acid in enterocyte: absorption, metabolism and maturation. *Front. Biosci. (Landmark Ed.)* *23*, 1721–1739.
- Clevers, H.C., and Bevins, C.L. (2013). Paneth cells: maestros of the small intestinal crypts. *Annu. Rev. Physiol.* *75*, 289–311.
- Date, S., and Sato, T. (2015). Mini-gut organoids: reconstitution of the stem cell niche. *Annu. Rev. Cell Dev. Biol.* *31*, 269–289.
- Dawson, P.A. (2011). Role of the intestinal bile acid transporters in bile acid and drug disposition. *Handb. Exp. Pharmacol.* 169–203.
- Delgado, M.E., and Brunner, T. (2019). The many faces of tumor necrosis factor signaling in the intestinal epithelium. *Genes Immun.* *20*, 609–626.
- Di Marco Barros, R., Roberts, N.A., Dart, R.J., Vantourout, P., Jandke, A., Nussbaumer, O., Deban, L., Cipolat, S., Hart, R., Iannitto, M.L., et al. (2016). Epithelia use butyrophilin-like molecules to shape organ-specific  $\gamma\delta$  T cell compartments. *Cell* *167*, 203–218.e217.
- Dillon, A., and Lo, D.D. (2019). M cells: intelligent engineering of mucosal immune surveillance. *Front. Immunol.* *10*, 1499.
- Dubey, R., van Kerkhof, P., Jordens, I., Malinauskas, T., Pusapati, G.V., McKenna, J.K., Li, D., Carette, J.E., Ho, M., Siebold, C., et al. (2020). R-spondins engage heparan sulfate proteoglycans to potentiate WNT signaling. *eLife* *9*, e54469.
- Engelstoft, M.S., Lund, M.L., Grunddal, K.V., Egerod, K.L., Osborne-Lawrence, S., Poulsen, S.S., Zigman, J.M., and Schwartz, T.W. (2015). Research resource: a chromogranin A reporter for serotonin and histamine secreting enteroendocrine cells. *Mol. Endocrinol.* *29*, 1658–1671.
- Feder, S., Daniel, H., and Rehner, G. (1991). In vivo kinetics of intestinal absorption of riboflavin in rats. *J. Nutr.* *121*, 72–79.
- Fish, E.M., and Burns, B. (2020). Physiology, small bowel. In *StatPearls [Internet]* (StatPearls Publishing).



- Fragkos, K.C., and Forbes, A. (2018). Citrulline as a marker of intestinal function and absorption in clinical settings: a systematic review and meta-analysis. *United Eur. Gastroenterol. J.* *6*, 181–191.
- Gao, G., Li, J., Zhang, Y., and Chang, Y.Z. (2019). Cellular iron metabolism and regulation. *Adv. Exp. Med. Biol.* *1173*, 21–32.
- Gassler, N. (2017). Paneth cells in intestinal physiology and pathophysiology. *World J. Gastrointest. Pathophysiol.* *8*, 150–160.
- Gehart, H., and Clevers, H. (2019). Tales from the crypt: new insights into intestinal stem cells. *Nat. Rev. Gastroenterol. Hepatol.* *16*, 19–34.
- Goldberg, A.D., Allis, C.D., and Bernstein, E. (2007). Epigenetics: a landscape takes shape. *Cell* *128*, 635–638.
- Gribble, F.M., and Reimann, F. (2019). Function and mechanisms of enteroendocrine cells and gut hormones in metabolism. *Nat. Rev. Endocrinol.* *15*, 226–237.
- Hegazy, E., and Schwenk, M. (1983). Riboflavin uptake by isolated enterocytes of Guinea pigs. *J. Nutr.* *113*, 1702–1707.
- Hernando, N., and Wagner, C.A. (2018). Mechanisms and regulation of intestinal phosphate absorption. *Compr. Physiol.* *8*, 1065–1090.
- Hussain, M.M. (2014). Intestinal lipid absorption and lipoprotein formation. *Curr. Opin. Lipidol.* *25*, 200–206.
- International Transporter, C., Giacomini, K.M., Huang, S.M., Tweedie, D.J., Benet, L.Z., Brouwer, K.L., Chu, X., Dahlin, A., Evers, R., Fischer, V., et al. (2010). Membrane transporters in drug development. *Nat. Rev. Drug Discov.* *9*, 215–236.
- Jho, E.H., Zhang, T., Domon, C., Joo, C.K., Freund, J.N., and Costantini, F. (2002). Wnt/beta-catenin/Tcf signaling induces the transcription of Axin2, a negative regulator of the signaling pathway. *Mol. Cell. Biol.* *22*, 1172–1183.
- Johansson, M.E., Sjoval, H., and Hansson, G.C. (2013). The gastrointestinal mucus system in health and disease. *Nat. Rev. Gastroenterol. Hepatol.* *10*, 352–361.
- Kaminsky, L.S., and Zhang, Q.Y. (2003). The small intestine as a xenobiotic-metabolizing organ. *Drug Metab. Dispos.* *31*, 1520–1525.
- Kato, M. (2008). Intestinal first-pass metabolism of CYP3A4 substrates. *Drug Metab. Pharmacokinet.* *23*, 87–94.
- Ko, C.W., Qu, J., Black, D.D., and Tso, P. (2020). Regulation of intestinal lipid metabolism: current concepts and relevance to disease. *Nat. Rev. Gastroenterol. Hepatol.* *17*, 169–183.
- Li, N., Yousefi, M., Nakauka-Ddamba, A., Tobias, J.W., Jensen, S.T., Morrisey, E.E., and Lengner, C.J. (2016). Heterogeneity in readouts of canonical wnt pathway activity within intestinal crypts. *Dev. Dyn.* *245*, 822–833.
- Lindemans, C.A., Calafiore, M., Mertelsmann, A.M., O'Connor, M.H., Dudakov, J.A., Jenq, R.R., Velardi, E., Young, L.F., Smith, O.M., Lawrence, G., et al. (2015). Interleukin-22 promotes intestinal-stem-cell-mediated epithelial regeneration. *Nature* *528*, 560–564.
- Martin, A.M., Sun, E.W., and Keating, D.J. (2019). Mechanisms controlling hormone secretion in human gut and its relevance to metabolism. *J. Endocrinol.* *244*, R1–R15.
- Mawe, G.M., and Hoffman, J.M. (2013). Serotonin signalling in the gut—functions, dysfunctions and therapeutic targets. *Nat. Rev. Gastroenterol. Hepatol.* *10*, 473–486.
- McKinnon, R.A., Burgess, W.M., Hall, P.M., Roberts-Thomson, S.J., Gonzalez, F.J., and McManus, M.E. (1995). Characterisation of CYP3A gene subfamily expression in human gastrointestinal tissues. *Gut* *36*, 259–267.
- Mead, B.E., Ordovas-Montanes, J., Braun, A.P., Levy, L.E., Bhargava, P., Szucs, M.J., Ammendolia, D.A., MacMullan, M.A., Yin, X., Hughes, T.K., et al. (2018). Harnessing single-cell genomics to improve the physiological fidelity of organoid-derived cell types. *BMC Biol.* *16*, 62.
- Michels, B.E., Mosa, M.H., Streibl, B.I., Zhan, T., Menche, C., Abou-El-Ardat, K., Darvishi, T., Czlonka, E., Wagner, S., Winter, J., et al. (2020). Pooled in vitro and in vivo CRISPR-cas9 screening identifies tumor suppressors in human colon organoids. *Cell Stem Cell* *26*, 782–792.e787.
- Middendorp, S., Schneeberger, K., Wiegerinck, C.L., Mokry, M., Akerman, R.D., van Wijngaarden, S., Clevers, H., and Nieuwenhuis, E.E. (2014). Adult stem cells in the small intestine are intrinsically programmed with their location-specific function. *Stem Cells* *32*, 1083–1091.
- Miyoshi, H., and Stappenbeck, T.S. (2013). In vitro expansion and genetic modification of gastrointestinal stem cells in spheroid culture. *Nat. Protoc.* *8*, 2471–2482.
- Moll, R., Schiller, D.L., and Franke, W.W. (1990). Identification of protein IT of the intestinal cytoskeleton as a novel type I cytokeratin with unusual properties and expression patterns. *J. Cell Biol.* *111*, 567–580.
- Neurath, M.F. (2019). Targeting immune cell circuits and trafficking in inflammatory bowel disease. *Nat. Immunol.* *20*, 970–979.
- Nevo, S., Kadouri, N., and Abramson, J. (2019). Tuft cells: from the mucosa to the thymus. *Immunol. Lett.* *210*, 1–9.
- Parikh, K., Antanaviciute, A., Fawcner-Corbett, D., Jagielowicz, M., Aulicino, A., Lagerholm, C., Davis, S., Kinchen, J., Chen, H.H., Alham, N.K., et al. (2019). Colonic epithelial cell diversity in health and inflammatory bowel disease. *Nature* *567*, 49–55.
- Pelaseyed, T., Bergstrom, J.H., Gustafsson, J.K., Ermund, A., Birch-enough, G.M., Schutte, A., van der Post, S., Svensson, F., Rodriguez-Pineiro, A.M., Nystrom, E.E., et al. (2014). The mucus and mucins of the goblet cells and enterocytes provide the first defense line of the gastrointestinal tract and interact with the immune system. *Immunol. Rev.* *260*, 8–20.
- Ringel, T., Frey, N., Ringnalda, F., Janjuha, S., Cherkaoui, S., Butz, S., Srivatsa, S., Pirkl, M., Russo, G., Villiger, L., et al. (2020). Genome-scale CRISPR screening in human intestinal organoids identifies drivers of TGF-beta resistance. *Cell Stem Cell* *26*, 431–440.e438.
- Sato, T., Stange, D.E., Ferrante, M., Vries, R.G., Van Es, J.H., Van den Brink, S., Van Houdt, W.J., Pronk, A., Van Gorp, J., Siersema, P.D., et al. (2011a). Long-term expansion of epithelial organoids from human colon, adenoma, adenocarcinoma, and Barrett's epithelium. *Gastroenterology* *141*, 1762–1772.



- Sato, T., van Es, J.H., Snippert, H.J., Stange, D.E., Vries, R.G., van den Born, M., Barker, N., Shroyer, N.F., van de Wetering, M., and Clevers, H. (2011b). Paneth cells constitute the niche for Lgr5 stem cells in intestinal crypts. *Nature* *469*, 415–418.
- Sato, T., Vries, R.G., Snippert, H.J., van de Wetering, M., Barker, N., Stange, D.E., van Es, J.H., Abo, A., Kujala, P., Peters, P.J., et al. (2009). Single Lgr5 stem cells build crypt-villus structures in vitro without a mesenchymal niche. *Nature* *459*, 262–265.
- Schutgens, F., and Clevers, H. (2020). Human organoids: tools for understanding biology and treating diseases. *Annu. Rev. Pathol.* *15*, 211–234.
- Smillie, C.S., Biton, M., Ordovas-Montanes, J., Sullivan, K.M., Burgin, G., Graham, D.B., Herbst, R.H., Rogel, N., Slyper, M., Waldman, J., et al. (2019). Intra- and inter-cellular rewiring of the human colon during ulcerative colitis. *Cell* *178*, 714–730.e722.
- Spohn, S.N., and Mawe, G.M. (2017). Non-conventional features of peripheral serotonin signalling—the gut and beyond. *Nat. Rev. Gastroenterol. Hepatol.* *14*, 412–420.
- Sugisawa, E., Takayama, Y., Takemura, N., Kondo, T., Hatakeyama, S., Kumagai, Y., Sunagawa, M., Tominaga, M., and Maruyama, K. (2020). RNA sensing by gut Piezo1 is essential for systemic serotonin synthesis. *Cell* *182*, 609–624.e621.
- Vadgama, J.V., and Evered, D.F. (1992). Characteristics of L-citrulline transport across rat small intestine in vitro. *Pediatr. Res.* *32*, 472–478.
- van der Flier, L.G., van Gijn, M.E., Hatzis, P., Kujala, P., Haegerbarth, A., Stange, D.E., Begthel, H., van den Born, M., Guryev, V., Oving, I., et al. (2009). Transcription factor achaete scute-like 2 controls intestinal stem cell fate. *Cell* *136*, 903–912.
- van der Vaart, J., and Clevers, H. (2020). Airway organoids as models of human disease. *J. Intern. Med.* *289*, 604–613.
- Wang, Y., Song, W., Wang, J., Wang, T., Xiong, X., Qi, Z., Fu, W., Yang, X., and Chen, Y.G. (2020). Single-cell transcriptome analysis reveals differential nutrient absorption functions in human intestine. *J. Exp. Med.* *217*, e20191130.
- Worthington, J.J., Reimann, F., and Gribble, F.M. (2018). Enteroendocrine cells—sensory sentinels of the intestinal environment and orchestrators of mucosal immunity. *Mucosal Immunol.* *11*, 3–20.
- Yin, X., Farin, H.F., van Es, J.H., Clevers, H., Langer, R., and Karp, J.M. (2014). Niche-independent high-purity cultures of Lgr5+ intestinal stem cells and their progeny. *Nat. Methods* *11*, 106–112.
- Zhou, J., Hegsted, M., McCutcheon, K.L., Keenan, M.J., Xi, X., Raggio, A.M., and Martin, R.J. (2006). Peptide YY and proglucagon mRNA expression patterns and regulation in the gut. *Obesity (Silver Spring)* *14*, 683–689.

**Stem Cell Reports, Volume 16**

**Supplemental Information**

**Assessing donor-to-donor variability in human intestinal organoid cultures**

**Sina Mohammadi, Carolina Morell-Perez, Charles W. Wright, Thomas P. Wyche, Cory H. White, Theodore R. Sana, and Linda A. Lieberman**



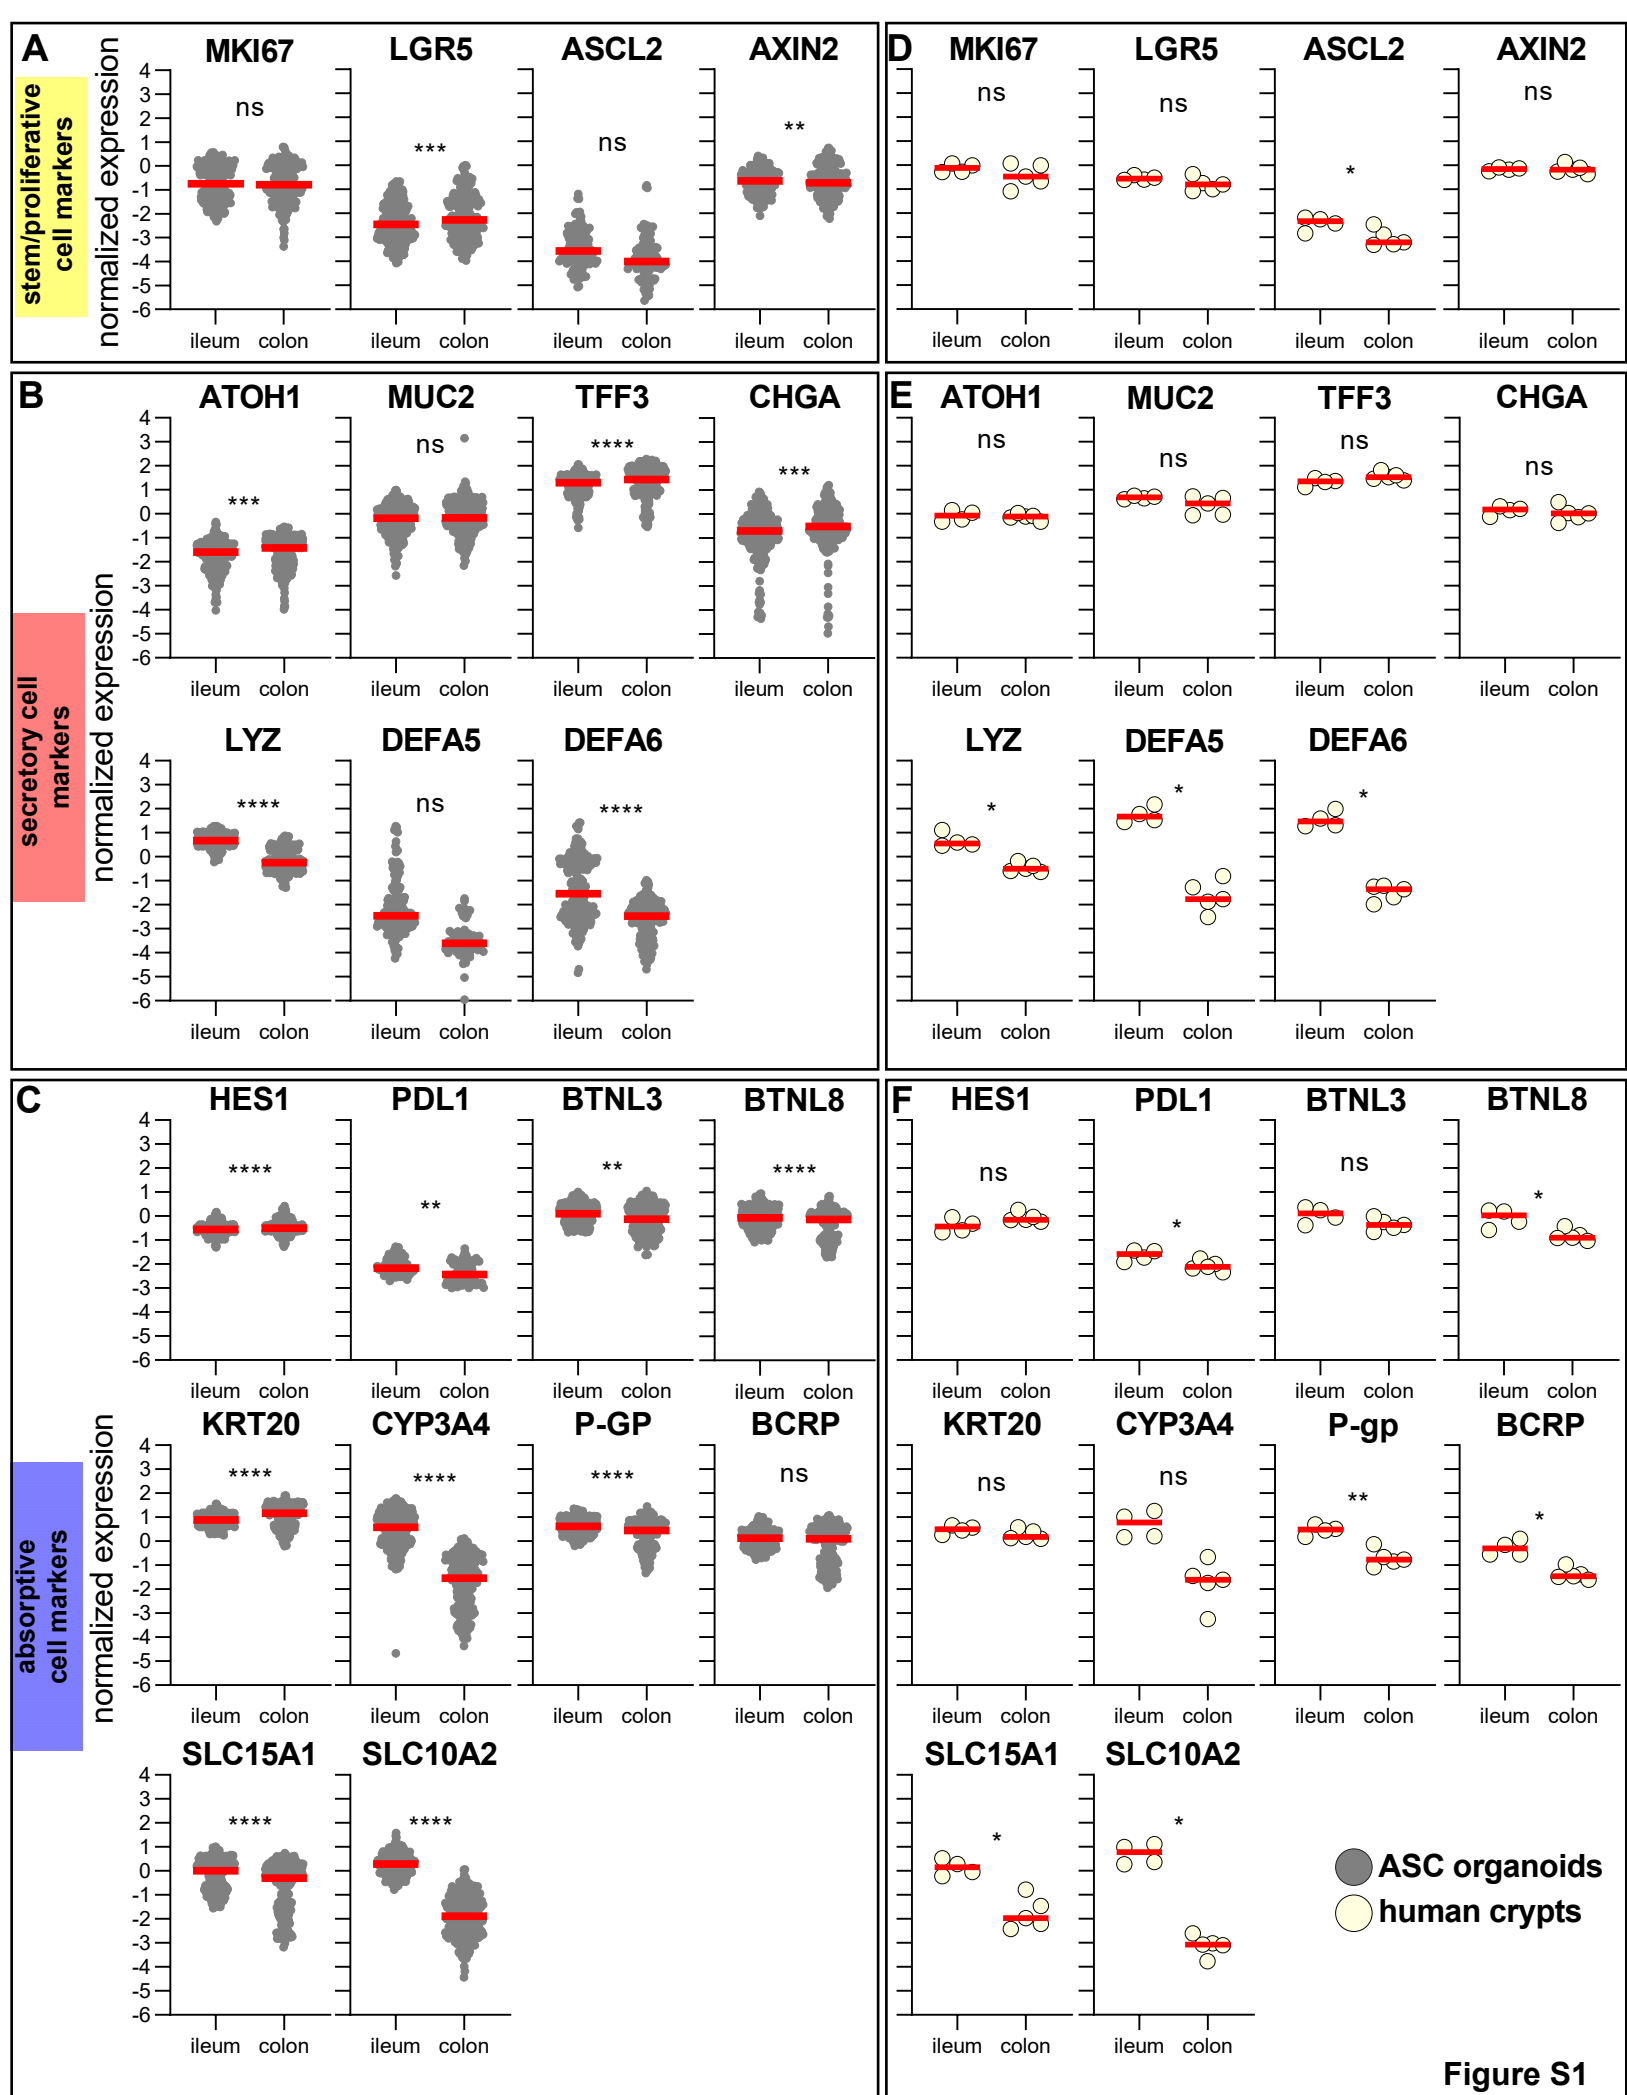

Figure S1

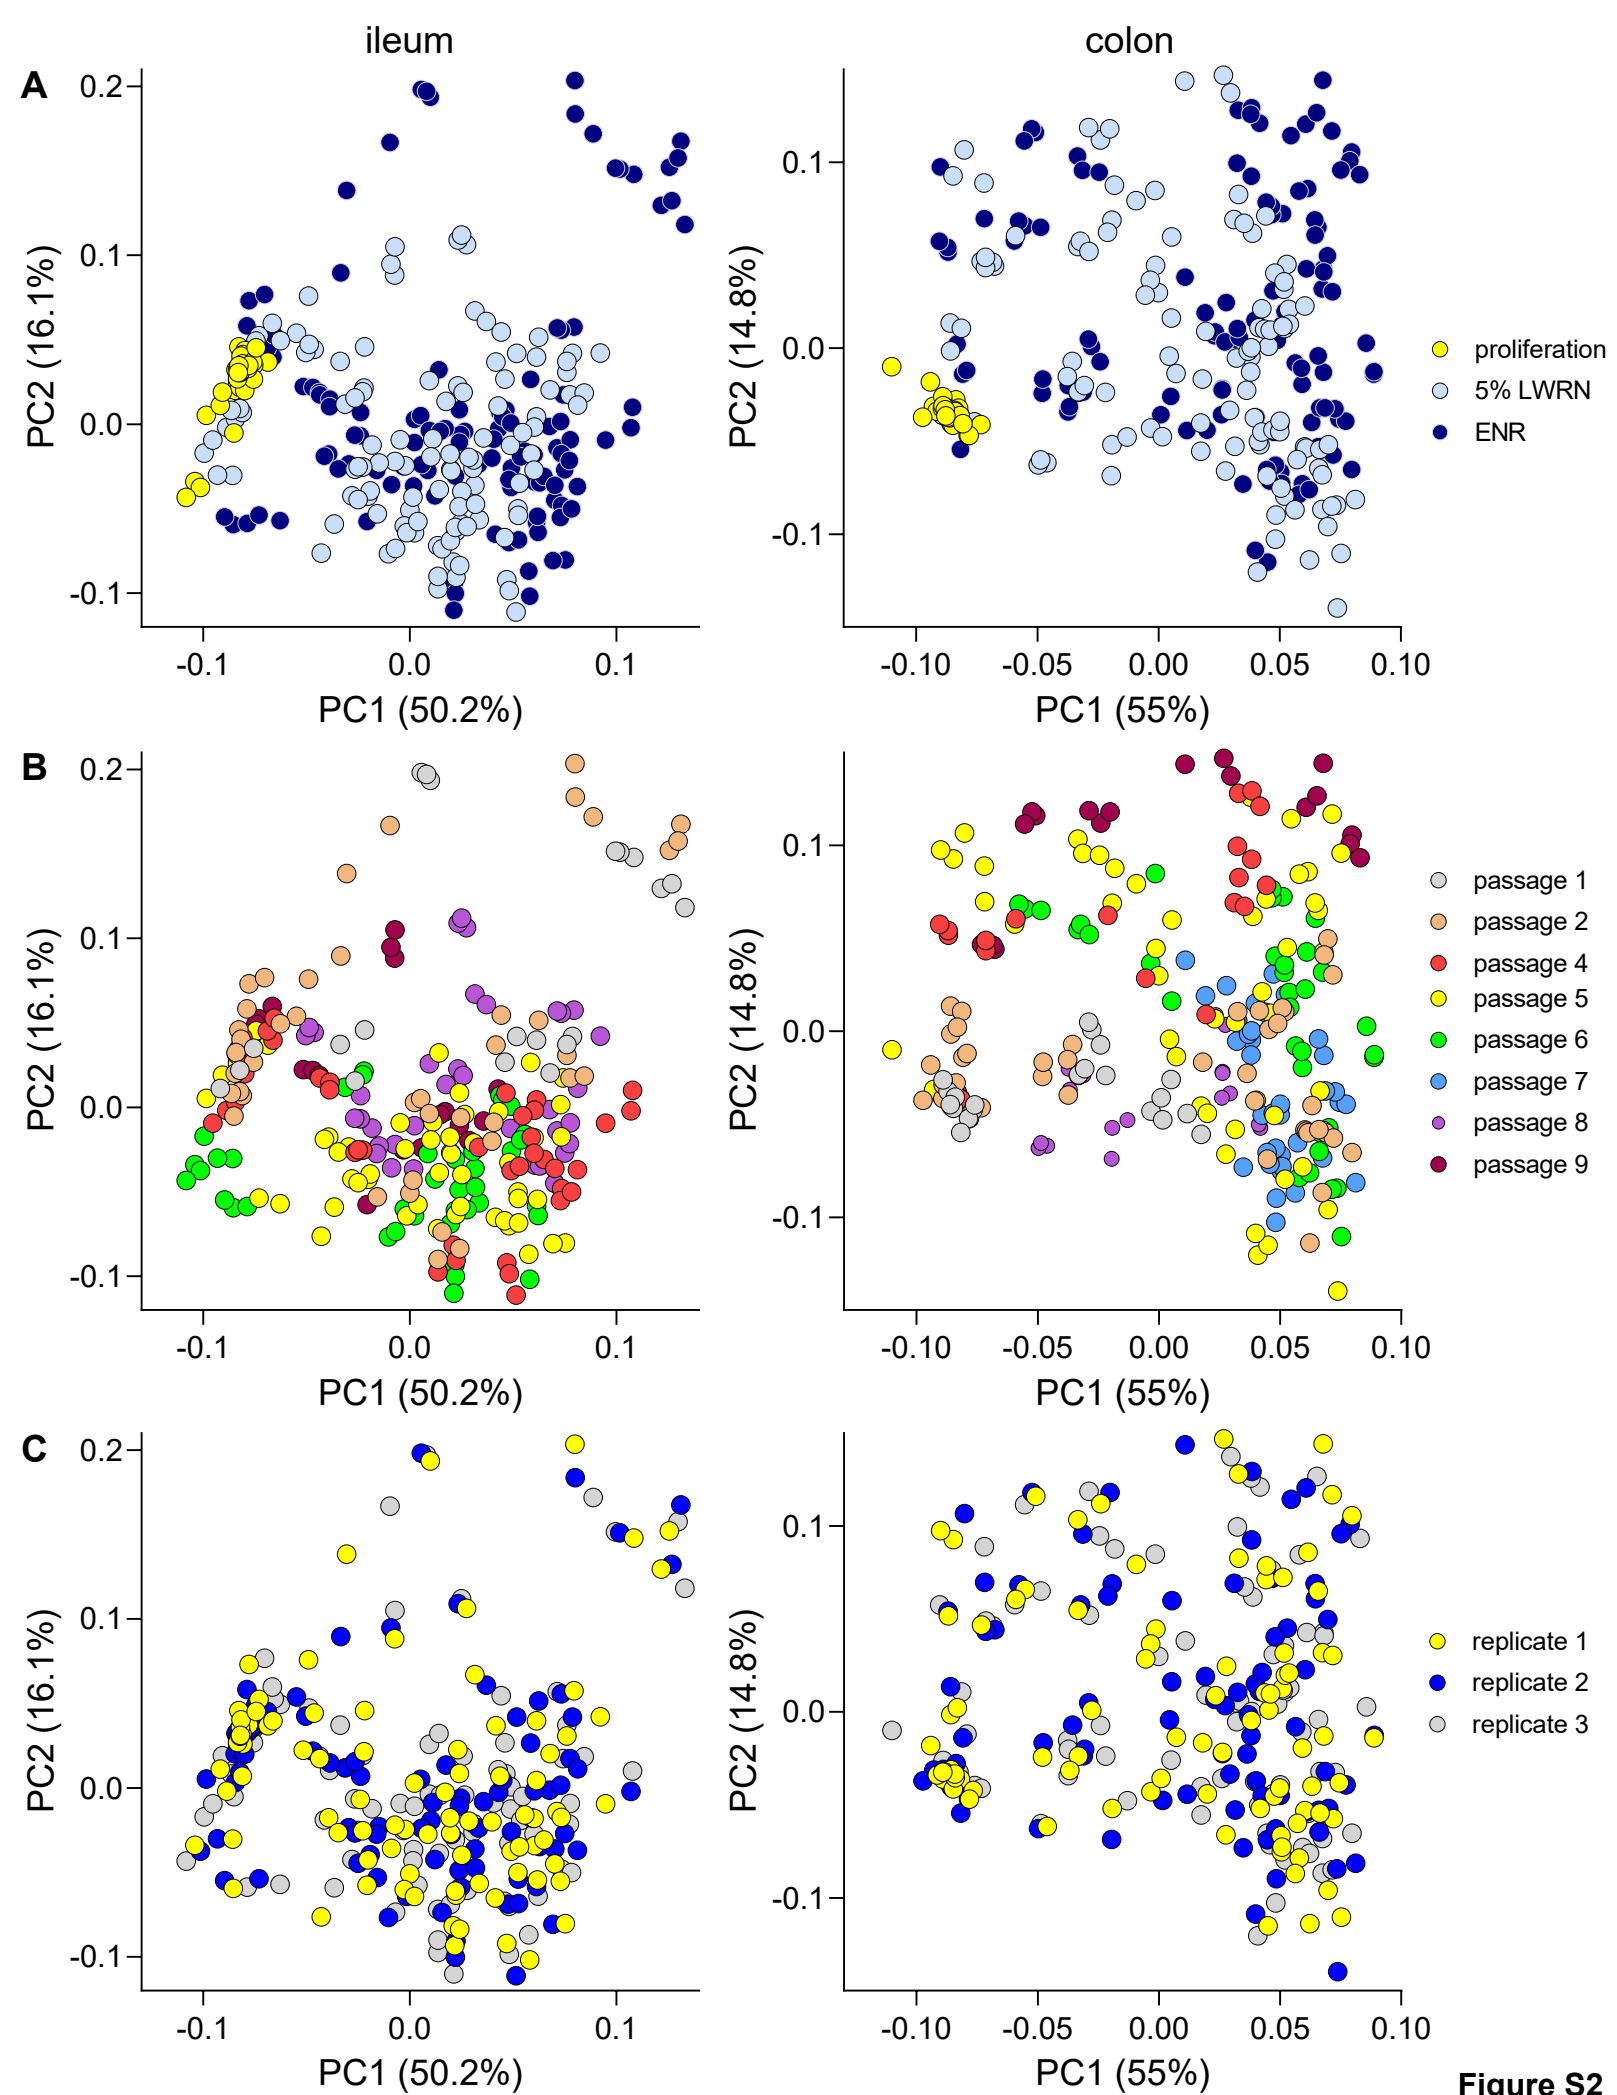

**Figure S2**

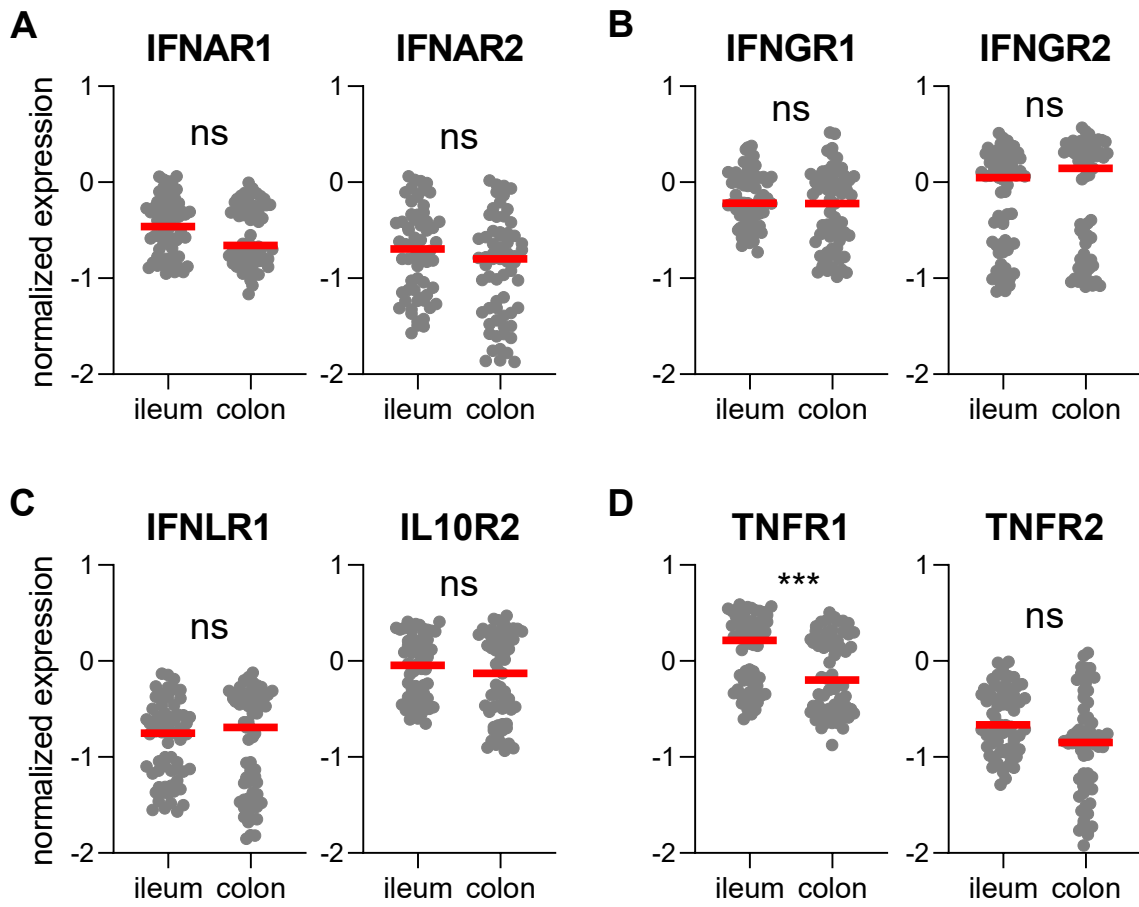

Figure S3

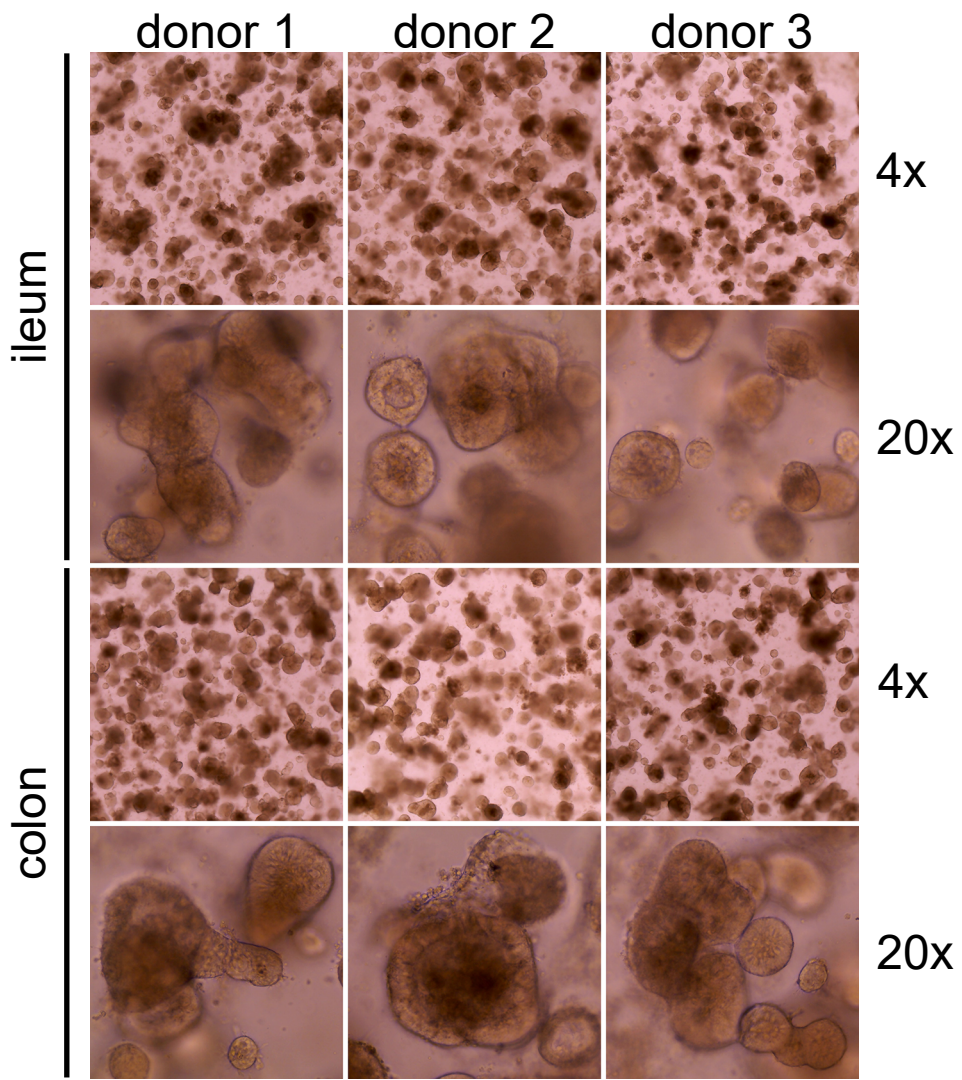

Figure S4

## Supplemental Figure Legends:

### Figure S1: Expression of markers in ileum or colon cultures

Expression of stem/proliferative (A and D), secretory (B and E), and absorptive (C and F) marker in both ileum and colon cultures (A-C) and human tissue (isolated crypts; D-F).

Expression was quantified using qPCR and normalized to endogenous control (PPIB). In panels A-C, all samples (all time points, time courses) are included for each tissue type. Red line marks median value for each population. Symbols: ns,  $p > 0.05$ ; \*  $p \leq 0.05$ ; \*\*  $p \leq 0.01$ ; \*\*\*  $p \leq 0.001$ ; \*\*\*\*  $p < 0.0001$ .

### Figure S2: Assessing variability based on media, passage, replicate, and tissue type

Principal component analysis with samples marked by media type (A), passage number (B), or replicate number (C). Each symbol represents a separate RNA sample analyzed by qPCR.

### Figure S3: Expression of immune receptors in ileum or colon cultures

Expression of type I (A), type II (B), and type III (C) interferon and TNF (D) receptors in both ileum and colon cultures (cumulative for all time points, time courses, and cultures). Expression, quantified by qPCR, was normalized to endogenous control (PPIB). Red line marks median value for each population. Symbols: ns,  $p > 0.05$ ; \*  $p \leq 0.05$ ; \*\*  $p \leq 0.01$ ; \*\*\*  $p \leq 0.001$ ; \*\*\*\*  $p < 0.0001$ .

### Figure S4: Brightfield analysis of ASC organoid cultures

Cultures from three donors were differentiated and on day 7, brightfield images were captured using a 4x (low magnification) and 20x (high magnification) objective lens.

**Supplemental Table 1: Donor demographics**

| donor number | age | sex    | ethnicity                | BMI (kg/m <sup>2</sup> ) | cause of death | acquisition state or territory | tissue |       |
|--------------|-----|--------|--------------------------|--------------------------|----------------|--------------------------------|--------|-------|
|              |     |        |                          |                          |                |                                | ileum  | colon |
| 1            | 47  | male   | African American         | 27.2                     | stroke         | GA                             | x      | x     |
| 2            | 43  | female | Caucasian                | 29.9                     | stroke         | OH                             | x      | x     |
| 3            | 27  | male   | Hispano                  | 32.9                     | trauma         | CA                             | x      | x     |
| 4            | 25  | male   | African American         | 21.3                     | stroke         | MD                             | x      | --    |
| 5            | 18  | male   | African American/Hispano | 19.7                     | stroke         | PR                             | --     | x     |
| 6            | 29  | male   | Hispano                  | 31.3                     | anoxia         | TX                             | x      | x     |

**Supplemental Table 2: Quantitative PCR markers**

| transcript       | TaqMan ID     | marker type              |
|------------------|---------------|--------------------------|
| PPIB             | Hs00168719_m1 | endogenous control       |
| MKI67            | Hs01032443_m1 | proliferative/stem cells |
| LGR5             | Hs00969422_m1 |                          |
| ASCL2            | Hs00270888_s1 |                          |
| AXIN2            | Hs00610344_m1 |                          |
| ATOH1            | Hs00944192_s1 | secretory cells          |
| MUC2             | Hs03005103_g1 |                          |
| TFF3             | Hs00902278_m1 |                          |
| CHGA             | Hs00900370_m1 |                          |
| LYZ              | Hs00426232_m1 |                          |
| DEFA5            | Hs00360716_m1 |                          |
| DEFA6            | Hs00427001_m1 |                          |
| HES1             | Hs00172878_m1 | absorptive cells         |
| PDL1/CD274       | Hs00204257_m1 |                          |
| BTNL3            | Hs00757802_m1 |                          |
| BTNL8            | Hs01063697_m1 |                          |
| KRT20            | Hs00300643_m1 |                          |
| CYP3A4           | Hs00604506_m1 |                          |
| P-gp/ABCB1/CD243 | Hs00184500_m1 |                          |
| BCRP/ABCG2       | Hs01053790_m1 |                          |
| SLC15A1          | Hs00192639_m1 |                          |
| SLC10A2/ASBT     | Hs01001557_m1 |                          |
| IFNAR1           | Hs01066116_m1 | immune receptors         |
| IFNAR2           | Hs01022059_m1 |                          |
| IFNGR1           | Hs00988304_m1 |                          |
| IFNGR2           | Hs00194264_m1 |                          |
| IFNLR1/IL28RA    | Hs00417120_m1 |                          |
| IL10R2/IL10RB    | Hs00175123_m1 |                          |
| TNFR1/TNFRSF1A   | Hs01042313_m1 |                          |
| TNFR2/TNFRSF1B   | Hs00961750_m1 |                          |

**Supplemental Table 3.** LC/MS method for targeted analysis of central carbon metabolites

| LC Conditions      |                                                                                                               |     |     |    |               |
|--------------------|---------------------------------------------------------------------------------------------------------------|-----|-----|----|---------------|
| Column             | Agilent ZORBAX RRHD Extend-C18, 2.1 × 150 mm, 1.8 μm (Part # 759700-902)                                      |     |     |    |               |
| Guard column       | ZORBAX Eclipse Plus C18, 2.1 mm, 1.8 μm, UHPLC guard column                                                   |     |     |    |               |
| Column temperature | 40 °C                                                                                                         |     |     |    |               |
| Needle wash        | Methanol:water (50:50) with 15 mM glacial acetic acid                                                         |     |     |    |               |
|                    | (A) Water:Methanol (97:3) with 15 mM glacial acetic acid and 10 mM tributylamine (Acros Organics AC139320010) |     |     |    |               |
|                    | (B) Methanol with 15 mM glacial acetic acid and 10 mM tributylamine                                           |     |     |    |               |
| Mobile phase       | (D) Acetonitrile                                                                                              |     |     |    |               |
| Flow rate          | Variable (see gradient table)                                                                                 |     |     |    |               |
|                    | Time (min)                                                                                                    | % A | % B | %D | Flow (mL/min) |
|                    | 2.5                                                                                                           | 100 | 0   | 0  | 0.25          |
|                    | 7.5                                                                                                           | 80  | 20  | 0  | 0.25          |
|                    | 13.00                                                                                                         | 55  | 45  | 0  | 0.25          |
|                    | 20.00                                                                                                         | 1   | 99  | 0  | 0.25          |
|                    | 24.00                                                                                                         | 1   | 99  | 0  | 0.25          |
|                    | 24.05                                                                                                         | 1   | 0   | 99 | 0.25          |
|                    | 27.00                                                                                                         | 1   | 0   | 99 | 0.25          |
|                    | 27.50                                                                                                         | 1   | 0   | 99 | 0.8           |
|                    | 31.35                                                                                                         | 1   | 0   | 99 | 0.8           |
|                    | 31.50                                                                                                         | 1   | 0   | 99 | 0.6           |
|                    | 32.25                                                                                                         | 100 | 0   | 0  | 0.4           |
|                    | 39.90                                                                                                         | 100 | 0   | 0  | 0.4           |
| Gradient program   | 40.00                                                                                                         | 100 | 0   | 0  | 0.25          |
| Stop time          | 40 mins                                                                                                       |     |     |    |               |
| MS Ionization mode | ESI negative                                                                                                  |     |     |    |               |



**Supplemental Table 4.** Metabolites identified by LC/MS QQQ analysis

| <b>Compound Name</b>                   | <b>CAS ID</b> |  | <b>Compound Name</b>         | <b>CAS ID</b> |
|----------------------------------------|---------------|--|------------------------------|---------------|
| 2-2-Dimethyl Succinic acid             | 597-43-3      |  | L-asparagine                 | 70-47-3       |
| 2-Deoxyadenosine 5-monophosphate       | 653-63-4      |  | L-Aspartic Acid              | 56-84-8       |
| 2-Deoxyguanosine 5-diphosphate         | 3493-09-2     |  | L-Carnitine                  | 541-15-1      |
| 2-Deoxyguanosine 5-monophosphate       | 902-04-5      |  | L-Citrulline                 | 372-75-8      |
| 2-Deoxyribose 5-phosphate              | 102916-66-5   |  | L-Glutamic acid              | 56-86-0       |
| 2-Deoxyuridine                         | 951-78-0      |  | L-Glutamine                  | 56-85-9       |
| 2-Methyl-1-butanol                     | 1565-80-6     |  | L-Gluthathione (oxidized)    | 27025-41-8    |
| 2-Phosphoglyceric acid                 | 2553-59-5     |  | L-Hydroxyglutaric acid       | 13095-48-2    |
| 4-Hydroxybenzoic acid                  | 99-96-7       |  | L-Isoleucine                 | 61-90-5       |
| 4-Hydroxy-L-glutamic acid              | 2485-33-8     |  | L-Kynurenine                 | 2922-83-0     |
| 4-Pyridoxic acid                       | 82-82-6       |  | L-Leucine                    | 61-90-5       |
| 5-Hydroxy-3-indoleacetic acid          | 54-16-0       |  | L-Malic acid                 | 97-67-6       |
| Adenine                                | 73-24-5       |  | L-Methionine                 | 63-68-3       |
| Adenosine                              | 58-61-7       |  | L-Phenylalanine              | 63-91-2       |
| Adenosine 3-5-cyclic monophosphate     | 60-92-4       |  | L-Proline                    | 147-85-3      |
| Adenosine 5-diphosphate                | 58-64-0       |  | L-Serine                     | 56-45-1       |
| Adenosine 5-monophosphate              | 61-19-8       |  | L-Sorbose                    | 87-79-6       |
| Adenosine 5-triphosphate               | 56-65-5       |  | L-Threonine                  | 72-19-5       |
| Adipic acid                            | 124-04-9      |  | L-Tryptophan                 | 73-22-3       |
| Allantoin                              | 97-59-6       |  | L-Tyrosine                   | 60-18-4       |
| alpha-D(+)Mannose 1-phosphate          | 27251-84-9    |  | Maleic acid                  | 110-16-7      |
| alpha-Ketoglutaric acid                | 328-50-7      |  | Malonic acid                 | 141-82-2      |
| Arabinose-5-phosphate                  | 13137-52-5    |  | myo-Inositol                 | 87-89-8       |
| Argininosuccinic acid                  | 2387-71-5     |  | N-Acetylglutamic acid        | 5817-08-3     |
| beta-Nicotinamide adenine dinucleotide | 53-84-9       |  | N-Acetylneuraminic acid      | 131-48-6      |
| Cellobiose                             | 528-50-7      |  | N-carbamoyl-DL-aspartic acid | 923-37-5      |
| Citramalic acid                        | 2306-22-1     |  | N-Carbamyl-L-glutamic acid   | 1188-38-1     |
| Citric acid                            | 77-92-9       |  | O-Phosphorylethanolamine     | 1071-23-4     |
| Creatine                               | 57-00-1       |  | Orotic acid                  | 65-86-1       |
| Creatinine                             | 60-27-5       |  | Phenylpyruvic acid           | 156-06-9      |
| Cytidine-5-monophosphate               | 63-37-6       |  | Phosphoenolpyruvic acid      | 138-08-9      |
| Deoxyguanosine 5-triphosphate          | 2564-35-4     |  | Pyridoxal hydrochloride      | 65-22-5       |
| D-Gluconic acid                        | 526-95-4      |  | Pyridoxine                   | 65-23-6       |
| Dihydroxyacetone phosphate             | 57-04-5       |  | Pyruvic acid                 | 127-17-3      |
| DL-2-Aminoadipic acid                  | 542-32-5      |  | Riboflavin                   | 83-88-5       |
| D-Mannose                              | 31103-86-3    |  | S-5-Adenosyl-L-homocysteine  | 979-92-0      |
| D-pantothenic acid                     | 79-83-4       |  | Salicylic acid               | 69-72-7       |

|                             |           |  |                               |            |
|-----------------------------|-----------|--|-------------------------------|------------|
| D-Sedoheptulose-7-phosphate | 2646-35-7 |  | Succinic acid                 | 110-15-6   |
| D-Xylose                    | 58-86-6   |  | Taurine                       | 107-35-7   |
| Flavin adenine dinucleotide | 146-14-5  |  | Taurocholic acid              | 83830-80-2 |
| Galactonic acid             | 576-36-3  |  | Thiamine                      | 67-03-8    |
| gamma-Glu-Cys               | 636-58-8  |  | Thymine                       | 65-71-4    |
| Glyceric acid               | 473-81-4  |  | trans-4-Hydroxy-L-proline     | 51-35-4    |
| Guanosine                   | 118-00-3  |  | Uracil                        | 66-22-8    |
| Guanosine 5-triphosphate    | 86-01-1   |  | Uric acid                     | 69-93-2    |
| Hypoxanthine                | 68-94-0   |  | Uridine                       | 58-96-8    |
| Inosine                     | 58-63-9   |  | Uridine 5-diphosphate         | 58-98-0    |
| Inosine 5-triphosphate      | 132-06-9  |  | Uridine 5'-diphosphogalactose | 2956-16-3  |
| Isopentyl acetate           | 123-92-2  |  | Uridine 5-diphosphoglucose    | 133-89-1   |
| Itaconic acid               | 97-65-4   |  | Uridine 5-monophosphate       | 58-97-9    |
| Ketovaleic acid             | 1821-02-9 |  | Uridine 5-triphosphate        | 63-39-8    |
| Lactic acid                 | 50-21-5   |  | Xanthine                      | 69-89-6    |
| L-Arabinose                 | 5328-37-0 |  | Xanthosine                    | 146-80-5   |
| L-Arabitol                  | 7643-75-6 |  | Xylitol                       | 87-99-0    |

## Supplemental Experimental Procedures:

### *Human ASC organoid culture*

Cultures were derived from donor tissue, essentially as previously described (Miyoshi and Stappenbeck, 2013; Sato et al., 2011a). Donor information is summarized in Table 1. All tissue was acquired from International Institute for the Advancement of Medicine in accordance with internal review board guidelines. Briefly, small intestine and colon tissue were cut open longitudinally and rinsed with cold PBS containing gentamicin and amphotericin B (Invitrogen R01510) to remove debris. Mucosa was dissected away from muscle tissue using fine scissors and forceps. Mucosa was sliced into 1mm<sup>2</sup> pieces using a tissue chopper. Tissue pieces were incubated in 10mM DTT at room temperature twice for 10 minutes with gentle agitation. DTT was replaced with ice cold 5mM EDTA and tissue was incubated at 4°C with gentle agitation. Crypts were released by shaking tubes by hand and filtering through a 100µm strainer. Isolated crypts were embedded in Matrigel (Corning 356237), plated in 24 well dishes, and overlaid with growth media as described previously (Sato et al., 2011a). Additionally, an aliquot of isolated crypts was lysed for RNA extraction (except for donor 3 ileum) and used as reference for original tissue gene expression analysis. After first passage, ASC organoids were cultured in 50% LWRN conditioned media containing 10µM Y27632 and 10µM SB431542 (Miyoshi and Stappenbeck, 2013). Media was changed every 2-3 days and cultures were passaged once per week.

### *Differentiation time course cultures*

ASC organoid cultures were differentiated as follows. ASC organoids were seeded in 24 well dishes and fed with proliferation media (50% LWRN + Y27632 + SB431542) as described previously (Miyoshi and Stappenbeck, 2013). This media is composed of conditioned media containing Wnt3a, Rspo3, and noggin along with Rho-associated protein kinase (ROCK) and transforming growth factor (TGF) β type I receptor inhibitors. This complex media does not contain EGF, previously shown to be critical for ASC organoid cultures (Sato et al., 2011a). It is thought that this activity is provided by undefined components present in serum. Similarly, it has been shown that noggin could be eliminated from this system without negatively affecting ASC organoid growth (Miyoshi and Stappenbeck, 2013). Media was changed on day 2 post seeding. Three days after seeding in 24 well dishes, media on cultures was changed to either 5% LWRN conditioned media (no Y27632 or SB431542) or a defined media containing 50ng/mL EGF, 100ng/mL Noggin, and 250ng/mL Rspo1 in Advanced DMEM/F12 (referred to as ENR media). ENR media was composed of purified EGF, Noggin, and Rspodin-1 added to base media. ENR media was used as it is composed entirely of defined components and is serum-free. 5% LWRN media was evaluated because of ease of preparation and low cost but keeping in mind the potential liabilities posed by presence of serum. Additional differences between the two media formulations is presence of Wnt. 5% LWRN media contains low amount of Wnt3a, while ENR media contains no added Wnt. As Wnt signaling is critical for stem cell maintenance in the intestine (Krausova and Korinek, 2014), 5% LWRN media could potentially stimulate low-level stem cell maintenance during the differentiation process. Low levels of Wnt3a in media could replenish the culture as cells terminally differentiate. However, this low level Wnt3a could skew differentiation patterns. As an example, as Paneth cell development and maintenance required Wnt signaling (Gassler, 2017; Ireland et al., 2005; Sato et al., 2011b), more Paneth cells may be found in cultures differentiated in

5% LWRN media. Because of both technical and potential impact on signaling pathways, both media formulations were included.

Media was changed on days 5, 7, and 9. Samples were collected for RNA purification on days 2, 4, 7, and 10. For RNA purification, 350 $\mu$ L RLT + 2-ME (Qiagen RNeasy kit) was added to each well. Lysates were stored at -80°C until purification. The number of time course carried out for each culture is as follows: 3, donor 1 ileum; 3, donor 1 colon; 3, donor 2 ileum; 3, donor 2 colon; 2, donor 3 ileum; 3, donor 3 colon; 3, donor 4 ileum; 2, donor 5, colon; 2, donor 6 ileum; 2, donor 6 colon. For each time course, 3 cell culture replicates (separate wells processed independently) were included for every condition. Three donor cultures (both ileum and colon cultures) were routinely maintained. For assays which used fewer than all six donors (Figures 4-7), no attempt was made to select best performing or most responsive cultures.

### *Quantitative PCR*

RNA was purified from ASC organoid cultures using RNeasy kit (Qiagen 74104), always including on-column DNase digest (Qiagen RNase-Free DNase Cat # 79254). cDNA was generated using SuperScript IV (Invitrogen 11756500) and diluted 5x with water to generate PCR template. TaqMan Fast Master Mix (Invitrogen 4444557) and TaqMan assays (Invitrogen) were used to assess gene expression and were used as indicated by the manufacturer (probes listed in Supplemental Table 2). Quantitative PCR was carried out on a QuantStudio 12K Flex instrument (Applied Biosystems). Data were normalized to an endogenous control (PPIB) using the  $\Delta$ Ct method as previously described (Schmittgen 2008). All markers are summarized in Table 2.

### *Principal component and correlation analysis*

Principal component analysis (PCA) was performed in the R statistical computing environment (Team, 2019) by singular value decomposition (SVD). Data was first scaled and centered prior to SVD. SVD was performed with the function SVDmiss in the SpatioTemporal package (Lindstrom et al., 2019). This function iteratively performs SVD while replacing missing values by linear regression of the columns onto the first four SVD components. Coordinates for the first two principle components were then plotted using Graphpad Prism. Coloring indicates membership in groups of interest such as day or donor. Total percent variation accounted for by each PC is given in the axes' labels. Correlations were performed in the R statistical computing environment. Samples were subset to those containing only the 5% LWRN and then further subset to those from only the day 7 timepoint. Correlations were performed with the cor function in R using the Pearson correlation metric and missing data was handled by casewise deletion using the complete.obs setting for the use argument.

### *Immunofluorescence staining*

ASC organoids were removed from Matrigel using cell recovery solution (Corning 354253) by incubating on ice for 30min (with occasional inversion to mix) and fixed using 4% paraformaldehyde in 1X PBS for 60min at ambient temperature. Fixed ASC organoids were washed with TBS containing 0.5% BSA three times and permeabilized for 2hrs at ambient temperature in TBS containing 0.5% BSA and 1% Triton X-100. ASC organoids were blocked in TBS containing 5% BSA and 0.1% Triton X-100 overnight at 4°C. Incubation with primary antibodies were carried out at 4°C overnight. Antibodies used were: MUC2 (1:200; Dako M731329-2), Lyzosyme (1:500; Invitrogen PA5-16668), Chromogranin A (1:100; Abcam

ab15160), E-cadherin (1:100; BD 610181), or E-cadherin (1:200 Cell Signaling Technology 3195S). Secondary antibodies were all from Invitrogen and were used at 1:250 dilution. Actin and DNA were detected with phalloidin (1:400; Invitrogen A22287) and Hoechst 33342 (1:2000; Invitrogen H3570) respectively. Stained ASC organoids were mounted on slides using ProLong Gold mounting media (Invitrogen P36934) and imaged on a Zeiss LSM800 confocal microscope using a Plan-Apochromat 63x/1.40NA lens. Contrast was adjusted linearly in Zeiss Zen software for each channel and merged 8-bit tiff images were exported. Figure was assembled in Adobe Photoshop. For quantification, multiple images were captured from each marker and culture. For each culture hundreds of cells were analyzed: >500 cells for all samples and markers except for lysozyme staining in donor 2 (307 cells) and donor 3 (473 cells) ileum cultures. DNA stain (Hoechst) was used to identify all cells. Cell type markers were used to identify specific differentiated cells. A ratio of cell type marker to total cells was calculated and presented as “% of cells”.

#### *Hormone secretion assay*

ASC organoids were plated as described for time course experiments (in 24 well dishes), changing to differentiation media (5% LWRN CM) on day 3 after plating. On day 7 after plating ASC organoids were washed 3x with 500 $\mu$ L PBS (+ Calcium/Magnesium) + 10mL HEPES. Hormone secretion was stimulated as previously described (Billing et al., 2018) by adding 200 $\mu$ L per well PBS (+ Calcium/Magnesium) + 10mL HEPES + 10 $\mu$ M forskolin (Sigma F6886) + 10 $\mu$ M IBMX (Sigma I5879) + 10mM glucose. Plates were incubated at 37°C/5% CO<sub>2</sub> overnight and supernatant collected. Four wells were collected for each condition. Commercially-available ELISA kits were used to quantify hormone levels (PYY: Millipore EZHPYYT66K; GPL1: Millipore EZGLP1T-36K; Serotonin: Enzo ADI-900-175).

#### *Metabolomics analysis*

Samples were analyzed by targeted LC/MS analysis, using an Agilent 6470 Triple Quadrupole (QQQ) mass spectrometer, in negative ionization mode, coupled to an Agilent 1290 Infinity II HPLC with quaternary pump. Metabolites were separated using an Agilent ZORBAX RRHD Extend-C18 (2.1  $\times$  150 mm, 1.8  $\mu$ m) column with the following mobile phases: (A) H<sub>2</sub>O:methanol (97:3) with 15 mM glacial acetic acid and 10 mM tributylamine; (B) methanol with 15 mM glacial acetic acid and 10 mM tributylamine; (D) acetonitrile. Multiple Reaction Monitoring (MRM) transitions for the central carbon metabolites were from the Agilent Metabolomics MRM Database and Method. Data was analyzed using Agilent Quantitative Analysis B.08 and Mass Profiler Professional version 14.9.1 software. Additional method information is in Supplementary Tables 3 and 4.

For each sample, media was aspirated, and ASC organoids and Matrigel were washed with PBS. Cell recovery solution (Corning # 354253) was added to Matrigel and transferred to a homogenization tube (Fisher #15-340-153), which was centrifuged at 500xg at 4 °C for 5 minutes. The supernatant was aspirated, and 500  $\mu$ L of ice cold extraction solvent (acetonitrile: methanol: water; 40:40:20) was added to each tube and homogenized with a bead mill homogenizer (Omni Bead Ruptor 19-040E) for 30 seconds at -5 °C at 5.0 m/s. ASC organoids were allowed to extract for 10 minutes at -20 °C. After 10 minutes, the tubes were centrifuged for 5 minutes at 4 °C at 14,000 x g. The supernatant (350  $\mu$ L) was transferred to a clean 1.5 mL microcentrifuge tube and dried under nitrogen. Each sample was dissolved in 30  $\mu$ L water:methanol (80:20) for LC/MS analysis.

*Statistics*

Comparisons were performed using a two-tailed Student's t test, calculated in either Microsoft Excel or Graphpad Prism. Asterisks indicate p value ranges as follows: ns,  $p > 0.05$ ; \*  $p \leq 0.05$ ; \*\*  $p \leq 0.01$ ; \*\*\*  $p \leq 0.001$ ; \*\*\*\*  $p < 0.0001$ .

## References:

- Billing, L.J., Smith, C.A., Larraufie, P., Goldspink, D.A., Galvin, S., Kay, R.G., Howe, J.D., Walker, R., Pruna, M., Glass, L., *et al.* (2018). Co-storage and release of insulin-like peptide-5, glucagon-like peptide-1 and peptide YY from murine and human colonic enteroendocrine cells. *Mol Metab* *16*, 65-75.
- Gassler, N. (2017). Paneth cells in intestinal physiology and pathophysiology. *World J Gastrointest Pathophysiol* *8*, 150-160.
- Ireland, H., Houghton, C., Howard, L., and Winton, D.J. (2005). Cellular inheritance of a Cre-activated reporter gene to determine Paneth cell longevity in the murine small intestine. *Dev Dyn* *233*, 1332-1336.
- Krausova, M., and Korinek, V. (2014). Wnt signaling in adult intestinal stem cells and cancer. *Cell Signal* *26*, 570-579.
- Lindstrom, J., Szpiro, A., Sampson, P.D., Bergen, S., and Oron, A.P. (2019). SpatioTemporal: Spatio-Temporal Model Estimation. R package version 1191.
- Miyoshi, H., and Stappenbeck, T.S. (2013). In vitro expansion and genetic modification of gastrointestinal stem cells in spheroid culture. *Nat Protoc* *8*, 2471-2482.
- Sato, T., Stange, D.E., Ferrante, M., Vries, R.G., Van Es, J.H., Van den Brink, S., Van Houdt, W.J., Pronk, A., Van Gorp, J., Siersema, P.D., *et al.* (2011a). Long-term expansion of epithelial organoids from human colon, adenoma, adenocarcinoma, and Barrett's epithelium. *Gastroenterology* *141*, 1762-1772.
- Sato, T., van Es, J.H., Snippert, H.J., Stange, D.E., Vries, R.G., van den Born, M., Barker, N., Shroyer, N.F., van de Wetering, M., and Clevers, H. (2011b). Paneth cells constitute the niche for Lgr5 stem cells in intestinal crypts. *Nature* *469*, 415-418.
- Team, R.C. (2019). R: A language and environment for statistical computing. R Foundation for Statistical Computing.
